# Supplementary material for: Diversity of Microbial Communities, PAHs, and Metals in Road and Leaf Dust of Functional Zones of Moscow and Murmansk
Source: MDPI journal article supplement (doi:10.3390/microorganisms11020526), 2023-02-18
Supplement: s1 [file s1]

## Supplementary Materials

# Diversity of Microbial Communities, PAHs, and Metals in Road and Leaf Dust of Functional Zones of Moscow and Murmansk

Anna A. Vetrova <sup>1,\*</sup>, Olesya I. Sazonova <sup>1,\*</sup>, Anastasia A. Ivanova <sup>1</sup>, Rostislav A. Streletskii <sup>2</sup>, Dmitriy A. Sarzhanov <sup>3</sup>, Maria V. Korneykova <sup>3,4</sup>, Andrey I. Novikov <sup>5</sup>, Viacheslav I. Vasenev <sup>6</sup>, Kristina V. Ivashchenko <sup>1,3</sup>, Marina V. Slukovskaya <sup>3,5,7</sup> and Olga Gavrichkova <sup>8</sup>

<sup>1</sup> Federal Research Center “Pushchino Scientific Center for Biological Research of the Russian Academy of Sciences”, 142290 Pushchino, Russia

<sup>2</sup> Faculty of Soil Science, Laboratory of Ecological Soil Science, Lomonosov Moscow State University, 119991 Moscow, Russia

<sup>3</sup> Agrarian and Technological Institute, Peoples’ Friendship University of Russia (RUDN University), 117198 Moscow, Russia

<sup>4</sup> Institute of North Industrial Ecology Problems Subdivision of the Federal Research Center “Kola Science Centre of Russian Academy of Science”, 184209 Apatity, Russia

<sup>5</sup> I.V. Tananaev Institute of Chemistry and Technology of Rare Elements and Mineral Raw Materials, Kola Science Centre, Russian Academy of Sciences, 184209 Apatity, Russia

<sup>6</sup> Soil Geography and Landscape Group, Wageningen University, 6707 Wageningen, The Netherlands

<sup>7</sup> Laboratory of Nature-Inspired Technologies and Environmental Safety of the Arctic Region, Kola Science Centre, Russian Academy of Sciences, 184209 Apatity, Russia

<sup>8</sup> Research Institute on Terrestrial Ecosystems, National Research Council, 05010 Porano, Italy

\* Correspondence: phdvetrova@gmail.com (A.A.V.); sazonova\_oi@rambler.ru (O.I.S.)

**Table S1.** Frequency distribution of bacterial classes/orders detected in biotopes of functional zones of Moscow and Murmansk.

| Phylum           | Class / Order         | Moscow       |              |              |              |              |              | Murmansk     |              |              |              |              |              |
|------------------|-----------------------|--------------|--------------|--------------|--------------|--------------|--------------|--------------|--------------|--------------|--------------|--------------|--------------|
|                  |                       | Road Dust    |              |              | Leaf Dust    |              |              | Road Dust    |              |              | Leaf Dust    |              |              |
|                  |                       | Recreational | Residential  | Traffic      |
| Abditibacteriota | <b>Abditibacteria</b> | <b>0,166</b> | <b>0,566</b> | <b>0,335</b> | <b>0,000</b> | <b>2,627</b> | <b>0,822</b> | <b>0,000</b> | <b>0,000</b> | <b>0,000</b> | <b>0,183</b> | <b>0,000</b> | <b>0,000</b> |
|                  | Abditibacteriales     | 2,065        | 0,623        | 0,486        | 0,017        | 0,023        | 0,160        | 0,018        | 0,142        | 0,307        | 0,002        | 0,003        | 0,009        |
| Acidobacteria    | <b>Acidobacteriia</b> | <b>0,130</b> | <b>0,000</b> | <b>0,153</b> | <b>2,395</b> | <b>0,110</b> | <b>0,124</b> | <b>0,122</b> | <b>0,204</b> | <b>0,081</b> | <b>0,000</b> | <b>0,758</b> | <b>0,056</b> |
|                  | Bryobacterales        | 0,002        | 0,009        | 0,000        | 0,000        | 0,001        | 0,000        | 0,012        | 0,001        | 0,001        | 0,000        | 0,001        | 0,001        |
|                  | Acidobacteriales      | 0,105        | 0,109        | 0,027        | 0,748        | 0,054        | 0,017        | 2,313        | 0,123        | 0,140        | 0,193        | 0,077        | 0,118        |
|                  | <b>Blastocatellia</b> | <b>1,986</b> | <b>1,817</b> | <b>0,288</b> | <b>0,021</b> | <b>0,045</b> | <b>0,053</b> | <b>0,063</b> | <b>3,728</b> | <b>1,915</b> | <b>0,009</b> | <b>0,150</b> | <b>0,166</b> |
|                  | Blastocatellales      | 1,868        | 1,750        | 0,275        | 0,021        | 0,044        | 0,051        | 0,062        | 3,628        | 1,872        | 0,009        | 0,146        | 0,163        |
|                  | <b>Holophagae</b>     | <b>0,000</b> | <b>0,000</b> | <b>0,000</b> | <b>0,002</b> | <b>0,000</b> | <b>0,001</b> | <b>0,000</b> | <b>0,000</b> | <b>0,000</b> | <b>0,009</b> | <b>0,000</b> | <b>0,000</b> |
|                  | Holophagales          | 0,000        | 0,000        | 0,000        | 0,000        | 0,000        | 0,000        | 0,000        | 0,000        | 0,000        | 0,001        | 0,000        | 0,000        |

|                |                        |               |               |               |              |              |               |               |               |               |              |              |              |
|----------------|------------------------|---------------|---------------|---------------|--------------|--------------|---------------|---------------|---------------|---------------|--------------|--------------|--------------|
| Actinobacteria | <b>Acidimicrobiia</b>  | <b>0,330</b>  | <b>0,916</b>  | <b>0,214</b>  | <b>0,041</b> | <b>0,059</b> | <b>0,064</b>  | <b>0,019</b>  | <b>2,439</b>  | <b>0,732</b>  | <b>0,030</b> | <b>0,297</b> | <b>0,278</b> |
|                | Acidimicrobiales       | 0,260         | 0,765         | 0,173         | 0,028        | 0,045        | 0,053         | 0,016         | 2,173         | 0,691         | 0,023        | 0,255        | 0,229        |
|                | <b>Actinobacteria</b>  | <b>12,614</b> | <b>13,250</b> | <b>19,718</b> | <b>2,761</b> | <b>3,855</b> | <b>12,608</b> | <b>13,271</b> | <b>22,920</b> | <b>20,187</b> | <b>3,161</b> | <b>6,152</b> | <b>9,851</b> |
|                | Acidothermales         | 0,000         | 0,000         | 0,001         | 0,000        | 0,000        | 0,000         | 0,001         | 0,000         | 0,000         | 0,000        | 0,000        | 0,000        |
|                | Actinomycetales        | 0,732         | 1,111         | 0,306         | 0,078        | 0,272        | 0,202         | 1,220         | 0,570         | 0,218         | 0,104        | 0,353        | 0,281        |
|                | Bifidobacteriales      | 0,003         | 0,000         | 0,000         | 0,009        | 0,015        | 0,102         | 0,000         | 0,000         | 0,002         | 0,009        | 0,444        | 0,158        |
|                | Candidatus             |               |               |               |              |              |               |               |               |               |              |              |              |
|                | Nanopelagicales        | 0,000         | 0,000         | 0,000         | 0,005        | 0,003        | 0,010         | 0,000         | 0,000         | 0,000         | 0,003        | 0,004        | 0,002        |
|                | Corynebacteriales      | 0,954         | 1,763         | 2,280         | 0,085        | 0,181        | 0,212         | 2,396         | 2,891         | 5,014         | 0,469        | 0,354        | 1,108        |
|                | Cryptosporangiales     | 0,000         | 0,000         | 0,003         | 0,000        | 0,000        | 0,001         | 0,000         | 0,000         | 0,000         | 0,000        | 0,000        | 0,000        |
|                | Frankiales             | 0,095         | 0,065         | 0,060         | 0,007        | 0,022        | 0,092         | 0,161         | 0,099         | 0,149         | 0,011        | 0,028        | 0,037        |
|                | Geodermatophilales     | 1,192         | 0,947         | 2,676         | 0,127        | 0,265        | 0,809         | 0,073         | 0,488         | 1,692         | 0,018        | 0,114        | 0,276        |
|                | Jatrophihabitantes     | 0,003         | 0,000         | 0,001         | 0,054        | 0,028        | 0,006         | 1,175         | 0,010         | 0,002         | 0,018        | 0,007        | 0,016        |
|                | Kineosporiales         | 0,170         | 0,155         | 0,106         | 0,185        | 0,082        | 0,264         | 0,021         | 0,206         | 0,110         | 0,021        | 0,046        | 0,040        |
|                | Micrococcales          | 2,462         | 2,174         | 3,863         | 0,888        | 0,888        | 1,432         | 4,811         | 6,540         | 3,867         | 1,789        | 2,172        | 3,874        |
|                | Micromonosporales      | 0,006         | 0,006         | 0,011         | 0,009        | 0,015        | 0,008         | 0,018         | 0,032         | 0,003         | 0,018        | 0,015        | 0,032        |
|                | Motilibacteriales      | 0,000         | 0,000         | 0,001         | 0,000        | 0,002        | 0,003         | 0,003         | 0,008         | 0,000         | 0,000        | 0,000        | 0,005        |
|                | Nakamurellales         | 0,220         | 0,353         | 0,303         | 0,159        | 0,193        | 4,586         | 2,439         | 1,132         | 0,499         | 0,082        | 0,426        | 0,523        |
|                | Propionibacteriales    | 3,715         | 3,976         | 3,857         | 0,927        | 1,208        | 3,671         | 0,343         | 7,505         | 4,889         | 0,242        | 1,376        | 1,850        |
|                | Pseudonocardiales      | 0,084         | 0,040         | 0,027         | 0,045        | 0,043        | 0,049         | 0,018         | 0,058         | 0,006         | 0,010        | 0,031        | 0,027        |
|                | Sporichthyales         | 0,016         | 0,020         | 0,003         | 0,001        | 0,004        | 0,005         | 0,005         | 0,059         | 0,126         | 0,000        | 0,002        | 0,009        |
|                | Streptomycetales       | 0,068         | 0,063         | 0,012         | 0,021        | 0,011        | 0,024         | 0,003         | 0,061         | 0,010         | 0,046        | 0,029        | 0,040        |
|                | Streptosporangiales    | 0,000         | 0,002         | 0,002         | 0,003        | 0,008        | 0,004         | 0,008         | 0,001         | 0,004         | 0,007        | 0,001        | 0,015        |
|                | Unclassified           | 2,896         | 2,573         | 6,203         | 0,158        | 0,614        | 1,128         | 0,578         | 3,260         | 3,596         | 0,313        | 0,751        | 1,557        |
|                | <b>Coriobacteriia</b>  | <b>0,000</b>  | <b>0,000</b>  | <b>0,000</b>  | <b>0,000</b> | <b>0,000</b> | <b>0,000</b>  | <b>0,738</b>  | <b>0,280</b>  | <b>1,288</b>  | <b>0,000</b> | <b>0,000</b> | <b>0,000</b> |
|                | Coriobacteriales       | 0,009         | 0,000         | 0,000         | 0,012        | 0,029        | 0,022         | 0,001         | 0,001         | 0,003         | 0,095        | 1,053        | 0,669        |
|                | Eggerthellales         | 0,000         | 0,000         | 0,000         | 0,002        | 0,009        | 0,004         | 0,000         | 0,000         | 0,000         | 0,023        | 0,166        | 0,027        |
|                | <b>Nitriliruptoria</b> | <b>0,001</b>  | <b>0,000</b>  | <b>0,000</b>  | <b>0,000</b> | <b>0,000</b> | <b>0,001</b>  | <b>0,000</b>  | <b>0,000</b>  | <b>0,000</b>  | <b>0,000</b> | <b>0,000</b> | <b>0,001</b> |
|                | Euzebyales             | 0,000         | 0,000         | 0,000         | 0,000        | 0,000        | 0,001         | 0,000         | 0,000         | 0,000         | 0,000        | 0,000        | 0,000        |
|                | <b>Rubrobacteria</b>   | <b>0,063</b>  | <b>0,048</b>  | <b>0,028</b>  | <b>0,003</b> | <b>0,007</b> | <b>0,019</b>  | <b>0,009</b>  | <b>0,078</b>  | <b>0,005</b>  | <b>0,010</b> | <b>0,029</b> | <b>0,030</b> |
|                | Gaiellales             | 0,033         | 0,021         | 0,018         | 0,002        | 0,001        | 0,005         | 0,000         | 0,048         | 0,003         | 0,002        | 0,023        | 0,018        |
|                | Rubrobacteriales       | 0,010         | 0,006         | 0,000         | 0,000        | 0,001        | 0,003         | 0,000         | 0,003         | 0,000         | 0,000        | 0,001        | 0,000        |
|                | <b>Thermoleophilia</b> | <b>0,364</b>  | <b>0,159</b>  | <b>0,070</b>  | <b>0,023</b> | <b>0,029</b> | <b>0,044</b>  | <b>0,033</b>  | <b>0,301</b>  | <b>0,078</b>  | <b>0,029</b> | <b>0,062</b> | <b>0,131</b> |
|                | Solirubrobacteriales   | 0,290         | 0,126         | 0,044         | 0,015        | 0,022        | 0,033         | 0,031         | 0,237         | 0,065         | 0,026        | 0,050        | 0,105        |
| Aquificae      | <b>Aquificae</b>       | <b>0,000</b>  | <b>0,000</b>  | <b>0,000</b>  | <b>0,000</b> | <b>0,000</b> | <b>0,001</b>  | <b>0,000</b>  | <b>0,000</b>  | <b>0,000</b>  | <b>0,000</b> | <b>0,000</b> | <b>0,000</b> |
|                | Aquificales            | 0,000         | 0,000         | 0,000         | 0,000        | 0,000        | 0,001         | 0,000         | 0,000         | 0,000         | 0,000        | 0,000        | 0,000        |

|                 |                         |               |              |              |              |              |              |               |              |              |              |              |              |
|-----------------|-------------------------|---------------|--------------|--------------|--------------|--------------|--------------|---------------|--------------|--------------|--------------|--------------|--------------|
| Armatimonadetes | <b>Armatimonadia</b>    | <b>0,076</b>  | <b>0,120</b> | <b>0,047</b> | <b>0,005</b> | <b>0,008</b> | <b>0,005</b> | <b>0,419</b>  | <b>0,216</b> | <b>0,238</b> | <b>0,001</b> | <b>0,005</b> | <b>0,007</b> |
|                 | Armatimonadales         | 0,057         | 0,091        | 0,035        | 0,002        | 0,003        | 0,003        | 0,056         | 0,172        | 0,182        | 0,001        | 0,004        | 0,004        |
|                 | Capsulimonadales        | 0,000         | 0,000        | 0,001        | 0,002        | 0,003        | 0,000        | 0,303         | 0,001        | 0,000        | 0,000        | 0,001        | 0,002        |
|                 | <b>Fimbriimonadia</b>   | <b>0,000</b>  | <b>0,009</b> | <b>0,001</b> | <b>0,000</b> | <b>0,000</b> | <b>0,000</b> | <b>0,000</b>  | <b>0,001</b> | <b>0,002</b> | <b>0,000</b> | <b>0,000</b> | <b>0,000</b> |
|                 | Fimbriimonadales        | 0,000         | 0,003        | 0,000        | 0,000        | 0,000        | 0,000        | 0,000         | 0,000        | 0,002        | 0,000        | 0,000        | 0,000        |
| Bacteroidetes   | <b>Bacteroidia</b>      | <b>0,000</b>  | <b>0,003</b> | <b>0,004</b> | <b>0,104</b> | <b>0,417</b> | <b>0,367</b> | <b>0,006</b>  | <b>0,008</b> | <b>0,036</b> | <b>0,297</b> | <b>0,290</b> | <b>0,215</b> |
|                 | Bacteroidales           | 0,000         | 0,002        | 0,003        | 0,101        | 0,406        | 0,356        | 0,006         | 0,007        | 0,034        | 0,287        | 0,282        | 0,206        |
|                 | Marinilabiales          | 0,000         | 0,000        | 0,000        | 0,000        | 0,000        | 0,000        | 0,000         | 0,000        | 0,000        | 0,000        | 0,000        | 0,001        |
|                 | <b>Chitinophagia</b>    | <b>1,061</b>  | <b>2,499</b> | <b>0,619</b> | <b>0,048</b> | <b>0,087</b> | <b>0,246</b> | <b>0,560</b>  | <b>2,920</b> | <b>0,540</b> | <b>0,021</b> | <b>0,210</b> | <b>1,836</b> |
|                 | Chitinophagales         | 0,950         | 2,292        | 0,577        | 0,045        | 0,082        | 0,240        | 0,515         | 2,781        | 0,503        | 0,021        | 0,198        | 1,811        |
|                 | <b>Cytophagia</b>       | <b>10,578</b> | <b>7,502</b> | <b>8,960</b> | <b>3,053</b> | <b>1,355</b> | <b>7,467</b> | <b>10,671</b> | <b>3,785</b> | <b>7,758</b> | <b>0,415</b> | <b>0,334</b> | <b>0,594</b> |
|                 | Cytophagales            | 9,782         | 6,997        | 8,571        | 2,963        | 1,310        | 7,328        | 10,252        | 3,574        | 7,391        | 0,410        | 0,319        | 0,562        |
|                 | <b>Flavobacteriia</b>   | <b>1,489</b>  | <b>1,410</b> | <b>0,432</b> | <b>0,052</b> | <b>0,171</b> | <b>0,112</b> | <b>0,008</b>  | <b>0,533</b> | <b>0,178</b> | <b>0,033</b> | <b>0,181</b> | <b>0,328</b> |
|                 | Flavobacteriales        | 1,431         | 1,350        | 0,414        | 0,051        | 0,169        | 0,109        | 0,008         | 0,517        | 0,175        | 0,033        | 0,178        | 0,321        |
|                 | <b>Saprospira</b>       | <b>0,000</b>  | <b>0,001</b> | <b>0,000</b> | <b>0,000</b> | <b>0,000</b> | <b>0,001</b> | <b>0,000</b>  | <b>0,000</b> | <b>0,000</b> | <b>0,000</b> | <b>0,000</b> | <b>0,002</b> |
|                 | Saprospirales           | 0,000         | 0,000        | 0,000        | 0,000        | 0,000        | 0,000        | 0,000         | 0,000        | 0,000        | 0,000        | 0,000        | 0,001        |
|                 | <b>Sphingobacteriia</b> | <b>0,974</b>  | <b>0,520</b> | <b>0,342</b> | <b>4,557</b> | <b>0,304</b> | <b>0,475</b> | <b>0,240</b>  | <b>0,782</b> | <b>0,156</b> | <b>0,016</b> | <b>0,096</b> | <b>0,111</b> |
|                 | Sphingobacteriales      | 0,939         | 0,496        | 0,339        | 4,406        | 0,299        | 0,468        | 0,234         | 0,729        | 0,149        | 0,016        | 0,089        | 0,110        |
|                 | Unclassified            | 0,008         | 0,011        | 0,001        | 0,002        | 0,000        | 0,000        | 0,000         | 0,006        | 0,000        | 0,000        | 0,000        | 0,000        |
| Chlamydiae      | <b>Chlamydiia</b>       | <b>0,022</b>  | <b>0,008</b> | <b>0,007</b> | <b>0,055</b> | <b>0,011</b> | <b>0,014</b> | <b>0,001</b>  | <b>0,013</b> | <b>0,004</b> | <b>0,007</b> | <b>0,002</b> | <b>0,027</b> |
|                 | Chlamydiales            | 0,001         | 0,000        | 0,001        | 0,001        | 0,000        | 0,000        | 0,000         | 0,000        | 0,000        | 0,000        | 0,000        | 0,000        |
|                 | Parachlamydiales        | 0,019         | 0,007        | 0,006        | 0,003        | 0,002        | 0,001        | 0,000         | 0,011        | 0,003        | 0,001        | 0,001        | 0,018        |
| Chloroflexi     | <b>Chlorobia</b>        | <b>0,001</b>  | <b>0,000</b> | <b>0,000</b> | <b>0,000</b> | <b>0,000</b> | <b>0,000</b> | <b>0,000</b>  | <b>0,000</b> | <b>0,000</b> | <b>0,000</b> | <b>0,000</b> | <b>0,000</b> |
|                 | <b>Anaerolineae</b>     | <b>0,002</b>  | <b>0,001</b> | <b>0,001</b> | <b>0,001</b> | <b>0,000</b> | <b>0,000</b> | <b>0,000</b>  | <b>0,003</b> | <b>0,000</b> | <b>0,000</b> | <b>0,000</b> | <b>0,000</b> |
|                 | <b>Caldilineae</b>      | <b>0,001</b>  | <b>0,010</b> | <b>0,000</b> | <b>0,003</b> | <b>0,000</b> | <b>0,001</b> | <b>0,000</b>  | <b>0,009</b> | <b>0,000</b> | <b>0,000</b> | <b>0,002</b> | <b>0,004</b> |
|                 | Caldilineales           | 0,001         | 0,008        | 0,000        | 0,002        | 0,000        | 0,001        | 0,000         | 0,006        | 0,000        | 0,000        | 0,002        | 0,002        |
|                 | Caldilineales           | 0,001         | 0,008        | 0,000        | 0,002        | 0,000        | 0,001        | 0,000         | 0,006        | 0,000        | 0,000        | 0,002        | 0,002        |
|                 | <b>Candidatus</b>       |               |              |              |              |              |              |               |              |              |              |              |              |
|                 | <b>Thermofonsia</b>     | <b>0,001</b>  | <b>0,002</b> | <b>0,000</b> | <b>0,000</b> | <b>0,000</b> | <b>0,000</b> | <b>0,000</b>  | <b>0,008</b> | <b>0,000</b> | <b>0,000</b> | <b>0,004</b> | <b>0,001</b> |
|                 | <b>Chloroflexia</b>     | <b>0,029</b>  | <b>0,091</b> | <b>0,009</b> | <b>0,003</b> | <b>0,002</b> | <b>0,001</b> | <b>0,002</b>  | <b>0,017</b> | <b>0,001</b> | <b>0,000</b> | <b>0,007</b> | <b>0,001</b> |
|                 | Chloroflexales          | 0,001         | 0,002        | 0,000        | 0,000        | 0,000        | 0,000        | 0,000         | 0,006        | 0,000        | 0,000        | 0,000        | 0,001        |
|                 | Herpetosiphonales       | 0,001         | 0,007        | 0,000        | 0,001        | 0,000        | 0,000        | 0,002         | 0,004        | 0,001        | 0,000        | 0,002        | 0,000        |
|                 | Kallotenuales           | 0,001         | 0,003        | 0,000        | 0,000        | 0,000        | 0,000        | 0,000         | 0,000        | 0,000        | 0,000        | 0,000        | 0,000        |
|                 | <b>Ktedonobacteria</b>  | <b>0,000</b>  | <b>0,000</b> | <b>0,000</b> | <b>0,000</b> | <b>0,002</b> | <b>0,000</b> | <b>0,008</b>  | <b>0,000</b> | <b>0,000</b> | <b>0,001</b> | <b>0,000</b> | <b>0,000</b> |
|                 | Ktedonobacterales       | 0,000         | 0,000        | 0,000        | 0,000        | 0,000        | 0,000        | 0,002         | 0,000        | 0,000        | 0,000        | 0,000        | 0,000        |

|                         |                              |              |              |              |              |              |              |              |              |              |              |              |              |
|-------------------------|------------------------------|--------------|--------------|--------------|--------------|--------------|--------------|--------------|--------------|--------------|--------------|--------------|--------------|
|                         | <b>Tepidiformia</b>          | <b>0,000</b> | <b>0,000</b> | <b>0,000</b> | <b>0,000</b> | <b>0,000</b> | <b>0,003</b> | <b>0,000</b> | <b>0,001</b> | <b>0,000</b> | <b>0,000</b> | <b>0,000</b> | <b>0,000</b> |
|                         | Tepidiformales               | 0,000        | 0,000        | 0,000        | 0,000        | 0,000        | 0,003        | 0,000        | 0,000        | 0,000        | 0,000        | 0,000        | 0,000        |
|                         | <b>Thermomicrobia</b>        | <b>0,009</b> | <b>0,008</b> | <b>0,001</b> | <b>0,002</b> | <b>0,000</b> | <b>0,003</b> | <b>0,000</b> | <b>0,010</b> | <b>0,001</b> | <b>0,000</b> | <b>0,000</b> | <b>0,001</b> |
|                         | Sphaerobacterales            | 0,000        | 0,000        | 0,001        | 0,001        | 0,000        | 0,001        | 0,000        | 0,002        | 0,000        | 0,000        | 0,000        | 0,000        |
| Deinococcus-<br>Thermus | <b>Deinococci</b>            | <b>3,198</b> | <b>2,145</b> | <b>1,423</b> | <b>0,031</b> | <b>0,138</b> | <b>0,218</b> | <b>0,688</b> | <b>0,841</b> | <b>1,973</b> | <b>0,030</b> | <b>0,097</b> | <b>0,234</b> |
|                         | Deinococcales                | 2,271        | 1,944        | 1,326        | 0,027        | 0,124        | 0,210        | 0,665        | 0,770        | 1,902        | 0,026        | 0,093        | 0,208        |
|                         | Thermales                    | 0,000        | 0,000        | 0,000        | 0,000        | 0,000        | 0,000        | 0,000        | 0,000        | 0,000        | 0,000        | 0,000        | 0,001        |
|                         | Trueperales                  | 0,775        | 0,116        | 0,049        | 0,004        | 0,013        | 0,004        | 0,000        | 0,048        | 0,011        | 0,005        | 0,002        | 0,019        |
| Firmicutes              | <b>Bacilli</b>               | <b>0,438</b> | <b>0,857</b> | <b>1,041</b> | <b>0,656</b> | <b>0,784</b> | <b>2,483</b> | <b>0,162</b> | <b>1,530</b> | <b>0,274</b> | <b>5,696</b> | <b>3,094</b> | <b>3,213</b> |
|                         | Bacillales                   | 0,365        | 0,745        | 0,921        | 0,500        | 0,389        | 2,049        | 0,135        | 1,366        | 0,150        | 0,754        | 0,691        | 1,136        |
|                         | Lactobacillales              | 0,003        | 0,002        | 0,005        | 0,135        | 0,368        | 0,358        | 0,009        | 0,015        | 0,088        | 4,834        | 2,317        | 1,969        |
|                         | <b>Clostridia</b>            | <b>0,057</b> | <b>0,134</b> | <b>0,031</b> | <b>0,209</b> | <b>3,798</b> | <b>0,393</b> | <b>0,143</b> | <b>0,481</b> | <b>0,173</b> | <b>2,078</b> | <b>9,247</b> | <b>2,998</b> |
|                         | Clostridiales                | 0,053        | 0,102        | 0,027        | 0,196        | 3,364        | 0,372        | 0,139        | 0,465        | 0,169        | 1,836        | 9,117        | 2,919        |
|                         | Halanaerobiales              | 0,000        | 0,000        | 0,001        | 0,000        | 0,000        | 0,000        | 0,000        | 0,000        | 0,000        | 0,000        | 0,000        | 0,001        |
|                         | Thermoanaerobacter<br>es     | 0,000        | 0,000        | 0,000        | 0,000        | 0,000        | 0,000        | 0,001        | 0,000        | 0,000        | 0,000        | 0,000        | 0,005        |
|                         | Thermosediminibacter<br>ales | 0,000        | 0,000        | 0,000        | 0,000        | 0,000        | 0,000        | 0,000        | 0,000        | 0,000        | 0,000        | 0,000        | 0,001        |
|                         | <b>Erysipelotrichia</b>      | <b>0,005</b> | <b>0,000</b> | <b>0,000</b> | <b>0,011</b> | <b>0,067</b> | <b>0,003</b> | <b>0,005</b> | <b>0,003</b> | <b>0,026</b> | <b>0,053</b> | <b>0,479</b> | <b>0,460</b> |
|                         | Erysipelotrichales           | 0,005        | 0,000        | 0,000        | 0,011        | 0,067        | 0,003        | 0,005        | 0,003        | 0,026        | 0,046        | 0,451        | 0,447        |
|                         | <b>Negativicutes</b>         | <b>0,000</b> | <b>0,001</b> | <b>0,004</b> | <b>0,042</b> | <b>0,111</b> | <b>0,129</b> | <b>0,004</b> | <b>0,006</b> | <b>0,011</b> | <b>0,135</b> | <b>0,093</b> | <b>0,066</b> |
|                         | Acidaminococcales            | 0,000        | 0,000        | 0,000        | 0,000        | 0,004        | 0,004        | 0,001        | 0,000        | 0,000        | 0,000        | 0,001        | 0,000        |
| Fusobacteria            | Selenomonadales              | 0,000        | 0,000        | 0,001        | 0,002        | 0,014        | 0,006        | 0,000        | 0,001        | 0,002        | 0,008        | 0,000        | 0,012        |
|                         | Veillonellales               | 0,000        | 0,000        | 0,002        | 0,038        | 0,082        | 0,113        | 0,000        | 0,000        | 0,009        | 0,115        | 0,086        | 0,050        |
|                         | <b>Tissierellia</b>          | <b>0,000</b> | <b>0,001</b> | <b>0,000</b> | <b>0,009</b> | <b>0,012</b> | <b>0,009</b> | <b>0,007</b> | <b>0,011</b> | <b>0,001</b> | <b>0,011</b> | <b>0,277</b> | <b>0,030</b> |
|                         | Tissierellales               | 0,000        | 0,001        | 0,000        | 0,006        | 0,012        | 0,009        | 0,007        | 0,011        | 0,001        | 0,010        | 0,267        | 0,030        |
|                         | <b>Fusobacteriia</b>         | <b>0,000</b> | <b>0,001</b> | <b>0,000</b> | <b>0,020</b> | <b>0,057</b> | <b>0,057</b> | <b>0,001</b> | <b>0,000</b> | <b>0,009</b> | <b>0,037</b> | <b>0,043</b> | <b>0,040</b> |
|                         | Fusobacteriales              | 0,000        | 0,001        | 0,000        | 0,020        | 0,056        | 0,052        | 0,001        | 0,000        | 0,009        | 0,036        | 0,041        | 0,040        |
| Gemmatimonadetes        | <b>Gemmatimonadetes</b>      | <b>0,256</b> | <b>0,218</b> | <b>0,190</b> | <b>0,007</b> | <b>0,010</b> | <b>0,014</b> | <b>0,224</b> | <b>0,320</b> | <b>0,063</b> | <b>0,007</b> | <b>0,032</b> | <b>0,063</b> |
|                         | Gemmatimonadales             | 0,198        | 0,194        | 0,145        | 0,007        | 0,007        | 0,013        | 0,091        | 0,298        | 0,052        | 0,007        | 0,025        | 0,055        |
|                         | <b>Longimicrobia</b>         | <b>0,029</b> | <b>0,399</b> | <b>0,071</b> | <b>0,001</b> | <b>0,003</b> | <b>0,005</b> | <b>0,000</b> | <b>0,002</b> | <b>0,001</b> | <b>0,000</b> | <b>0,003</b> | <b>0,000</b> |
|                         | Longimicrobiales             | 0,019        | 0,345        | 0,046        | 0,001        | 0,001        | 0,003        | 0,000        | 0,001        | 0,001        | 0,000        | 0,003        | 0,000        |
| Ignavibacteria          | <b>Ignavibacteria</b>        | <b>0,003</b> | <b>0,002</b> | <b>0,000</b> |
| Nitrospirae             | <b>Nitrospira</b>            | <b>0,008</b> | <b>0,001</b> | <b>0,001</b> | <b>0,000</b> | <b>0,000</b> | <b>0,002</b> | <b>0,000</b> | <b>0,009</b> | <b>0,000</b> | <b>0,000</b> | <b>0,000</b> | <b>0,004</b> |
| Planctomycetes          | Nitrospirales                | 0,008        | 0,001        | 0,000        | 0,000        | 0,000        | 0,002        | 0,000        | 0,009        | 0,000        | 0,000        | 0,000        | 0,004        |

|                |                              |               |               |               |               |               |               |               |               |               |               |               |               |
|----------------|------------------------------|---------------|---------------|---------------|---------------|---------------|---------------|---------------|---------------|---------------|---------------|---------------|---------------|
|                | <b>Phycisphaerae</b>         | <b>0,372</b>  | <b>0,363</b>  | <b>0,423</b>  | <b>0,004</b>  | <b>0,004</b>  | <b>0,004</b>  | <b>0,044</b>  | <b>0,335</b>  | <b>0,271</b>  | <b>0,001</b>  | <b>0,005</b>  | <b>0,005</b>  |
|                | Phycisphaerales              | 0,000         | 0,001         | 0,000         | 0,000         | 0,000         | 0,000         | 0,000         | 0,000         | 0,000         | 0,000         | 0,000         | 0,000         |
|                | Tepidisphaerales             | 0,241         | 0,216         | 0,255         | 0,003         | 0,002         | 0,003         | 0,032         | 0,117         | 0,084         | 0,000         | 0,002         | 0,004         |
|                | <b>Planctomycetia</b>        | <b>0,834</b>  | <b>0,861</b>  | <b>0,685</b>  | <b>0,033</b>  | <b>0,068</b>  | <b>0,049</b>  | <b>1,211</b>  | <b>1,570</b>  | <b>0,676</b>  | <b>0,068</b>  | <b>0,180</b>  | <b>0,441</b>  |
|                | Gemmatales                   | 0,127         | 0,126         | 0,053         | 0,003         | 0,009         | 0,004         | 0,022         | 0,196         | 0,058         | 0,007         | 0,031         | 0,039         |
|                | Isosphaerales                | 0,124         | 0,104         | 0,213         | 0,006         | 0,014         | 0,010         | 0,460         | 0,420         | 0,292         | 0,025         | 0,050         | 0,248         |
|                | Pirellulales                 | 0,005         | 0,005         | 0,004         | 0,000         | 0,003         | 0,004         | 0,001         | 0,014         | 0,001         | 0,002         | 0,008         | 0,013         |
|                | Planctomycetales             | 0,185         | 0,123         | 0,106         | 0,011         | 0,017         | 0,012         | 0,541         | 0,316         | 0,124         | 0,024         | 0,041         | 0,071         |
| Proteobacteria | <b>Alphaproteobacteria</b>   | <b>18,862</b> | <b>17,644</b> | <b>22,523</b> | <b>16,813</b> | <b>5,526</b>  | <b>10,322</b> | <b>26,261</b> | <b>14,344</b> | <b>21,103</b> | <b>3,859</b>  | <b>4,391</b>  | <b>10,761</b> |
|                | Caulobacterales              | 0,672         | 0,426         | 0,490         | 0,019         | 0,052         | 0,070         | 0,245         | 0,421         | 0,209         | 0,077         | 0,089         | 0,539         |
|                | Holosporales                 | 0,005         | 0,000         | 0,003         | 0,003         | 0,004         | 0,002         | 0,001         | 0,000         | 0,003         | 0,002         | 0,001         | 0,000         |
|                | Hyphomonadales               | 0,002         | 0,003         | 0,000         | 0,000         | 0,001         | 0,001         | 0,000         | 0,004         | 0,000         | 0,000         | 0,001         | 0,004         |
|                | Micropepsales                | 0,008         | 0,001         | 0,001         | 0,000         | 0,000         | 0,000         | 0,001         | 0,000         | 0,000         | 0,000         | 0,000         | 0,002         |
|                | Rhizobiales                  | 1,750         | 1,229         | 2,249         | 1,355         | 0,631         | 1,491         | 5,600         | 2,025         | 3,867         | 0,920         | 0,872         | 5,863         |
|                | Rhodobacterales              | 4,948         | 5,984         | 3,454         | 0,217         | 0,959         | 0,655         | 0,021         | 1,273         | 0,240         | 0,073         | 0,386         | 0,517         |
|                | Rhodospirillales             | 4,592         | 3,651         | 7,681         | 10,982        | 2,134         | 3,059         | 14,472        | 3,531         | 7,026         | 2,208         | 1,691         | 1,423         |
|                | Rickettsiales                | 0,000         | 0,000         | 0,005         | 0,016         | 0,024         | 0,035         | 0,005         | 0,002         | 0,006         | 0,037         | 0,004         | 0,040         |
|                | Sphingomonadales             | 4,883         | 4,767         | 6,903         | 3,656         | 1,490         | 4,749         | 4,419         | 5,843         | 8,525         | 0,307         | 1,166         | 1,779         |
|                | <b>Betaproteobacteria</b>    | <b>3,811</b>  | <b>6,912</b>  | <b>4,923</b>  | <b>1,188</b>  | <b>1,213</b>  | <b>2,511</b>  | <b>2,518</b>  | <b>7,162</b>  | <b>8,209</b>  | <b>0,478</b>  | <b>2,003</b>  | <b>5,894</b>  |
|                | Burkholderiales              | 2,096         | 4,899         | 4,434         | 1,075         | 0,968         | 2,277         | 1,771         | 5,882         | 6,436         | 0,368         | 1,746         | 5,575         |
|                | Neisseriales                 | 0,003         | 0,006         | 0,001         | 0,028         | 0,048         | 0,102         | 0,002         | 0,003         | 0,002         | 0,048         | 0,021         | 0,081         |
|                | Nitrosomonadales             | 0,017         | 0,018         | 0,001         | 0,001         | 0,005         | 0,007         | 0,006         | 0,009         | 0,003         | 0,001         | 0,007         | 0,007         |
|                | Procabacteriales             | 0,000         | 0,000         | 0,000         | 0,000         | 0,000         | 0,000         | 0,000         | 0,002         | 0,001         | 0,000         | 0,000         | 0,000         |
|                | Rhodocyclales                | 0,000         | 0,002         | 0,002         | 0,000         | 0,000         | 0,001         | 0,000         | 0,000         | 0,001         | 0,001         | 0,001         | 0,001         |
|                | <b>Deltaproteobacteria</b>   | <b>0,290</b>  | <b>0,764</b>  | <b>0,147</b>  | <b>0,291</b>  | <b>0,123</b>  | <b>0,088</b>  | <b>0,307</b>  | <b>0,367</b>  | <b>0,280</b>  | <b>1,151</b>  | <b>0,461</b>  | <b>0,536</b>  |
|                | Desulfobacterales            | 0,000         | 0,000         | 0,000         | 0,000         | 0,000         | 0,000         | 0,000         | 0,000         | 0,001         | 0,000         | 0,001         | 0,000         |
|                | Desulfovibrionales           | 0,000         | 0,000         | 0,000         | 0,000         | 0,001         | 0,000         | 0,000         | 0,000         | 0,000         | 0,000         | 0,000         | 0,000         |
|                | Desulfuromonadales           | 0,003         | 0,007         | 0,003         | 0,011         | 0,002         | 0,003         | 0,010         | 0,012         | 0,008         | 0,002         | 0,003         | 0,053         |
|                | Myxococcales                 | 0,105         | 0,426         | 0,047         | 0,010         | 0,010         | 0,040         | 0,026         | 0,130         | 0,007         | 0,017         | 0,040         | 0,087         |
|                | <b>Epsilonproteobacteria</b> | <b>0,000</b>  | <b>0,000</b>  | <b>0,000</b>  | <b>0,000</b>  | <b>0,000</b>  | <b>0,007</b>  | <b>0,000</b>  | <b>0,001</b>  | <b>0,001</b>  | <b>0,000</b>  | <b>0,002</b>  | <b>0,005</b>  |
|                | Campylobacterales            | 0,000         | 0,000         | 0,000         | 0,000         | 0,000         | 0,007         | 0,000         | 0,001         | 0,001         | 0,000         | 0,002         | 0,005         |
|                | <b>Gammaproteobacteria</b>   | <b>0,759</b>  | <b>1,157</b>  | <b>2,499</b>  | <b>18,602</b> | <b>27,560</b> | <b>20,197</b> | <b>0,170</b>  | <b>1,563</b>  | <b>1,598</b>  | <b>12,805</b> | <b>18,438</b> | <b>4,573</b>  |
|                | Acidiferrobacterales         | 0,000         | 0,000         | 0,000         | 0,000         | 0,000         | 0,001         | 0,000         | 0,000         | 0,000         | 0,000         | 0,000         | 0,000         |
|                | Aeromonadales                | 0,001         | 0,005         | 0,000         | 0,000         | 0,001         | 0,000         | 0,000         | 0,000         | 0,002         | 0,003         | 0,023         | 0,002         |
|                | Alteromonadales              | 0,000         | 0,000         | 0,001         | 0,000         | 0,008         | 0,000         | 0,000         | 0,001         | 0,000         | 0,000         | 0,000         | 0,006         |

|                 |                          |              |              |              |              |              |              |              |              |              |              |              |              |
|-----------------|--------------------------|--------------|--------------|--------------|--------------|--------------|--------------|--------------|--------------|--------------|--------------|--------------|--------------|
|                 | Cardiobacteriales        | 0,000        | 0,000        | 0,000        | 0,000        | 0,001        | 0,000        | 0,000        | 0,000        | 0,000        | 0,000        | 0,000        | 0,000        |
|                 | Cellvibrionales          | 0,023        | 0,042        | 0,005        | 0,000        | 0,001        | 0,002        | 0,001        | 0,004        | 0,009        | 0,000        | 0,003        | 0,005        |
|                 | Chromatiales             | 0,005        | 0,047        | 0,015        | 0,005        | 0,003        | 0,007        | 0,000        | 0,001        | 0,003        | 0,002        | 0,009        | 0,041        |
|                 | Enterobacterales         | 0,003        | 0,009        | 0,007        | 15,601       | 25,240       | 9,782        | 0,009        | 0,003        | 0,011        | 8,728        | 17,420       | 2,027        |
|                 | Immundisolibacterales    | 0,002        | 0,012        | 0,000        | 0,000        | 0,001        | 0,000        | 0,000        | 0,004        | 0,000        | 0,000        | 0,000        | 0,004        |
|                 | Legionellales            | 0,003        | 0,020        | 0,009        | 0,003        | 0,002        | 0,004        | 0,037        | 0,013        | 0,018        | 0,017        | 0,013        | 0,020        |
|                 | Methylococcales          | 0,000        | 0,000        | 0,000        | 0,000        | 0,002        | 0,000        | 0,000        | 0,001        | 0,000        | 0,001        | 0,003        | 0,001        |
|                 | Nevskiales               | 0,000        | 0,000        | 0,000        | 0,000        | 0,000        | 0,003        | 0,003        | 0,002        | 0,001        | 0,000        | 0,000        | 1,406        |
|                 | Oceanospirillales        | 0,001        | 0,000        | 0,001        | 0,003        | 0,000        | 0,002        | 0,000        | 0,004        | 0,000        | 0,000        | 0,000        | 0,021        |
|                 | Pasteurellales           | 0,001        | 0,000        | 0,001        | 0,000        | 0,018        | 0,008        | 0,000        | 0,000        | 0,003        | 0,005        | 0,008        | 0,036        |
|                 | Pseudomonadales          | 0,073        | 0,435        | 2,170        | 0,315        | 1,052        | 1,352        | 0,015        | 0,107        | 1,057        | 2,105        | 0,188        | 0,557        |
|                 | Thiotrichales            | 0,000        | 0,000        | 0,000        | 0,001        | 0,000        | 0,000        | 0,000        | 0,000        | 0,001        | 0,000        | 0,000        | 0,002        |
|                 | Vibrionales              | 0,000        | 0,000        | 0,000        | 0,000        | 0,000        | 0,000        | 0,000        | 0,000        | 0,000        | 0,000        | 0,000        | 0,021        |
|                 | Xanthomonadales          | 0,602        | 0,513        | 0,204        | 0,013        | 0,043        | 0,045        | 0,069        | 1,344        | 0,427        | 0,020        | 0,159        | 0,298        |
|                 | <b>Hydrogenophilalia</b> | <b>0,000</b> | <b>0,000</b> | <b>0,000</b> | <b>0,000</b> | <b>0,001</b> | <b>0,003</b> | <b>0,000</b> | <b>0,000</b> | <b>0,000</b> | <b>0,000</b> | <b>0,000</b> | <b>0,000</b> |
|                 | Hydrogenophilales        | 0,000        | 0,000        | 0,000        | 0,000        | 0,001        | 0,003        | 0,000        | 0,000        | 0,000        | 0,000        | 0,000        | 0,000        |
|                 | <b>Oligoflexia</b>       | <b>0,293</b> | <b>1,598</b> | <b>1,007</b> | <b>0,038</b> | <b>0,053</b> | <b>0,041</b> | <b>0,046</b> | <b>1,591</b> | <b>0,426</b> | <b>0,032</b> | <b>0,124</b> | <b>0,247</b> |
|                 | Bacteriovoracales        | 0,084        | 0,179        | 0,117        | 0,001        | 0,009        | 0,008        | 0,001        | 0,256        | 0,071        | 0,005        | 0,010        | 0,036        |
|                 | Bdellovibrionales        | 0,074        | 0,927        | 0,689        | 0,024        | 0,024        | 0,018        | 0,014        | 0,769        | 0,159        | 0,017        | 0,062        | 0,133        |
|                 | Oligoflexales            | 0,004        | 0,063        | 0,002        | 0,003        | 0,003        | 0,003        | 0,001        | 0,057        | 0,002        | 0,003        | 0,005        | 0,005        |
|                 | Silvanigrellales         | 0,020        | 0,068        | 0,001        | 0,000        | 0,000        | 0,000        | 0,001        | 0,001        | 0,003        | 0,001        | 0,000        | 0,000        |
|                 | <b>Rhodothermia</b>      | <b>0,496</b> | <b>0,127</b> | <b>0,116</b> | <b>0,002</b> | <b>0,009</b> | <b>0,003</b> | <b>0,001</b> | <b>0,311</b> | <b>0,036</b> | <b>0,000</b> | <b>0,017</b> | <b>0,014</b> |
| Rhodothermaeota | Rhodothermales           | 0,461        | 0,118        | 0,105        | 0,001        | 0,009        | 0,003        | 0,001        | 0,295        | 0,035        | 0,000        | 0,016        | 0,014        |
|                 | <b>Spirochaetia</b>      | <b>0,000</b> | <b>0,000</b> | <b>0,001</b> | <b>0,000</b> | <b>0,000</b> | <b>0,001</b> | <b>0,001</b> | <b>0,000</b> | <b>0,000</b> | <b>0,003</b> | <b>0,001</b> | <b>0,000</b> |
|                 | Leptospirales            | 0,000        | 0,000        | 0,001        | 0,000        | 0,000        | 0,000        | 0,000        | 0,000        | 0,000        | 0,000        | 0,000        | 0,000        |
|                 | Spirochaetales           | 0,000        | 0,000        | 0,000        | 0,000        | 0,000        | 0,001        | 0,001        | 0,000        | 0,000        | 0,003        | 0,001        | 0,000        |
| Spirochaetes    | <b>Mollicutes</b>        | <b>0,096</b> | <b>0,303</b> | <b>0,382</b> | <b>2,371</b> | <b>0,310</b> | <b>3,024</b> | <b>0,156</b> | <b>0,444</b> | <b>0,419</b> | <b>4,050</b> | <b>4,335</b> | <b>4,796</b> |
|                 | Acholeplasmatales        | 0,092        | 0,266        | 0,358        | 2,313        | 0,260        | 2,980        | 0,036        | 0,417        | 0,394        | 3,939        | 4,251        | 4,724        |
|                 | Entomoplasmatales        | 0,000        | 0,000        | 0,000        | 0,000        | 0,001        | 0,000        | 0,000        | 0,000        | 0,000        | 0,000        | 0,000        | 0,000        |
|                 | Mycoplasmatales          | 0,000        | 0,000        | 0,000        | 0,000        | 0,000        | 0,001        | 0,000        | 0,000        | 0,000        | 0,005        | 0,001        | 0,005        |
|                 | <b>Opitutae</b>          | <b>0,030</b> | <b>0,051</b> | <b>0,006</b> | <b>0,001</b> | <b>0,007</b> | <b>0,003</b> | <b>0,000</b> | <b>0,016</b> | <b>0,001</b> | <b>0,002</b> | <b>0,010</b> | <b>0,004</b> |
|                 | <b>Spartobacteria</b>    | <b>0,604</b> | <b>0,971</b> | <b>0,195</b> | <b>0,010</b> | <b>0,032</b> | <b>0,016</b> | <b>0,129</b> | <b>0,301</b> | <b>0,055</b> | <b>0,011</b> | <b>0,037</b> | <b>0,044</b> |
| Verrucomicrobia | <b>Terrimicrobia</b>     | <b>0,000</b> | <b>0,001</b> | <b>0,000</b> | <b>0,001</b> |
|                 | <b>Verrucomicrobiae</b>  | <b>0,208</b> | <b>0,730</b> | <b>0,143</b> | <b>0,012</b> | <b>0,014</b> | <b>0,032</b> | <b>0,006</b> | <b>0,338</b> | <b>0,081</b> | <b>0,009</b> | <b>0,062</b> | <b>0,076</b> |
|                 | <b>Verrucomicrobiae</b>  | <b>0,338</b> | <b>0,143</b> | <b>0,081</b> | <b>0,000</b> | <b>0,208</b> | <b>0,730</b> | <b>0,076</b> | <b>0,000</b> | <b>0,062</b> | <b>0,000</b> | <b>0,000</b> | <b>0,000</b> |

|                    |       |       |       |       |       |       |       |       |       |       |       |       |
|--------------------|-------|-------|-------|-------|-------|-------|-------|-------|-------|-------|-------|-------|
| Verrucomicrobiales | 0,187 | 0,682 | 0,131 | 0,011 | 0,013 | 0,031 | 0,005 | 0,308 | 0,074 | 0,008 | 0,052 | 0,069 |
|--------------------|-------|-------|-------|-------|-------|-------|-------|-------|-------|-------|-------|-------|

**Table S2.** Frequency distribution of fungal classes/orders detected in biotopes of functional zones of Moscow and Murmansk.

| Phylum     | Class / Order              | Moscow        |               |               |               |               |               | Murmansk      |               |               |               |               |               |
|------------|----------------------------|---------------|---------------|---------------|---------------|---------------|---------------|---------------|---------------|---------------|---------------|---------------|---------------|
|            |                            | Road Dust     |               |               | Leaf Dust     |               |               | Road Dust     |               |               | Leaf Dust     |               |               |
|            |                            | Recreational  | Residential   | Traffic       |
| Ascomycota | <b>Archaeorhizomycetes</b> | <b>0,000</b>  | <b>0,004</b>  | <b>0,000</b>  | <b>0,000</b>  | <b>0,000</b>  | <b>0,000</b>  |
|            | Archaeorhizomycetales      | 0,000         | 0,000         | 0,000         | 0,000         | 0,000         | 0,000         | 0,000         | 0,004         | 0,000         | 0,000         | 0,000         | 0,000         |
|            | Arthoniales                | 0,000         | 0,000         | 0,000         | 0,000         | 0,000         | 0,000         | 0,000         | 0,004         | 0,000         | 0,000         | 0,000         | 0,000         |
|            | Lichenostigmatales         | 0,000         | 0,000         | 0,023         | 0,000         | 0,030         | 0,048         | 0,038         | 0,045         | 0,043         | 0,081         | 0,045         | 0,004         |
|            | <b>Arthoniomycetes</b>     | <b>0,000</b>  | <b>0,000</b>  | <b>0,029</b>  | <b>0,010</b>  | <b>0,043</b>  | <b>0,053</b>  | <b>0,131</b>  | <b>0,134</b>  | <b>0,082</b>  | <b>0,306</b>  | <b>0,048</b>  | <b>0,005</b>  |
|            | <b>Candelariomycetes</b>   | <b>0,013</b>  | <b>0,014</b>  | <b>0,000</b>  | <b>0,000</b>  | <b>0,000</b>  | <b>0,000</b>  | <b>0,005</b>  | <b>0,007</b>  | <b>0,016</b>  | <b>0,000</b>  | <b>0,000</b>  | <b>0,002</b>  |
|            | Candelariales              | 0,013         | 0,014         | 0,000         | 0,000         | 0,000         | 0,000         | 0,005         | 0,007         | 0,016         | 0,000         | 0,000         | 0,002         |
|            | <b>Dothideomycetes</b>     | <b>40,301</b> | <b>33,345</b> | <b>57,803</b> | <b>33,277</b> | <b>30,795</b> | <b>61,419</b> | <b>3,948</b>  | <b>29,113</b> | <b>18,932</b> | <b>43,005</b> | <b>58,891</b> | <b>83,629</b> |
|            | Abrothallales              | 0,000         | 0,000         | 0,000         | 0,000         | 0,000         | 0,000         | 0,009         | 0,000         | 0,035         | 0,000         | 0,000         | 0,000         |
|            | Acrospermales              | 0,027         | 0,000         | 0,003         | 0,000         | 0,000         | 0,005         | 0,000         | 0,000         | 0,000         | 0,000         | 0,000         | 0,000         |
|            | Botryosphaeriales          | 0,453         | 0,569         | 1,323         | 0,307         | 0,105         | 0,300         | 0,005         | 0,030         | 0,020         | 0,029         | 0,020         | 0,009         |
|            | Capnodiales                | 0,067         | 0,007         | 0,013         | 0,000         | 0,000         | 0,005         | 0,005         | 0,004         | 0,008         | 0,011         | 0,002         | 0,019         |
|            | Cladosporiales             | 2,396         | 1,261         | 0,696         | 0,456         | 1,174         | 0,161         | 0,150         | 3,717         | 1,299         | 0,299         | 0,416         | 0,167         |
|            | Dothideales                | 2,729         | 2,001         | 7,174         | 13,466        | 11,586        | 21,731        | 0,671         | 8,236         | 3,665         | 27,955        | 23,793        | 31,066        |
|            | Hysteriales                | 0,000         | 0,000         | 0,000         | 0,000         | 0,003         | 0,000         | 0,000         | 0,000         | 0,000         | 0,000         | 0,000         | 0,000         |
|            | Muyocopronales             | 0,027         | 0,021         | 0,023         | 0,000         | 0,000         | 0,000         | 0,000         | 0,004         | 0,000         | 0,000         | 0,000         | 0,000         |
|            | Mycosphaerellales          | 1,731         | 0,528         | 0,356         | 0,362         | 0,469         | 0,070         | 0,108         | 0,816         | 1,954         | 0,269         | 0,139         | 0,835         |
|            | Myriangiales               | 0,013         | 0,034         | 0,168         | 0,045         | 0,022         | 0,380         | 0,249         | 0,037         | 0,043         | 0,260         | 0,436         | 0,000         |
|            | Mytilinidiales             | 0,080         | 0,048         | 0,000         | 0,000         | 0,008         | 0,000         | 0,000         | 0,004         | 0,000         | 0,000         | 0,000         | 0,000         |
|            | Neophaeothecales           | 0,000         | 0,000         | 0,000         | 0,000         | 0,000         | 0,000         | 0,000         | 0,000         | 0,086         | 0,000         | 0,000         | 0,000         |
|            | Phaeothecales              | 0,000         | 0,000         | 0,000         | 0,000         | 0,003         | 0,000         | 0,080         | 0,004         | 0,043         | 0,111         | 0,028         | 0,104         |
|            | Pleosporales               | 18,293        | 15,720        | 23,821        | 2,731         | 3,839         | 2,049         | 0,333         | 5,023         | 3,700         | 0,283         | 0,628         | 0,114         |
|            | Strigulales                | 0,000         | 0,000         | 0,000         | 0,000         | 0,003         | 0,000         | 0,000         | 0,000         | 0,000         | 0,002         | 0,000         | 0,000         |
|            | Tubeufiales                | 0,013         | 0,007         | 0,000         | 0,000         | 0,000         | 0,000         | 0,005         | 0,000         | 0,016         | 0,000         | 0,000         | 0,000         |
|            | Unclassified               | 13,993        | 12,725        | 23,983        | 14,691        | 12,973        | 36,534        | 0,685         | 7,728         | 0,895         | 11,276        | 32,973        | 51,136        |
|            | Venturiales                | 0,479         | 0,425         | 0,243         | 1,219         | 0,611         | 0,185         | 1,648         | 3,510         | 7,169         | 2,512         | 0,456         | 0,179         |
|            | <b>Eurotiomycetes</b>      | <b>15,138</b> | <b>25,416</b> | <b>6,643</b>  | <b>7,613</b>  | <b>3,378</b>  | <b>2,323</b>  | <b>52,164</b> | <b>13,108</b> | <b>24,037</b> | <b>2,854</b>  | <b>2,342</b>  | <b>0,541</b>  |

|                        |              |               |              |              |              |              |               |              |               |               |              |              |
|------------------------|--------------|---------------|--------------|--------------|--------------|--------------|---------------|--------------|---------------|---------------|--------------|--------------|
| Chaetothyriales        | 8,334        | 23,429        | 5,821        | 5,412        | 2,333        | 2,117        | 48,841        | 11,742       | 22,828        | 1,352         | 1,476        | 0,160        |
| Eurotiales             | 0,120        | 0,130         | 0,074        | 0,134        | 0,151        | 0,115        | 0,023         | 0,156        | 0,110         | 0,043         | 0,165        | 0,049        |
| Mycocaliciales         | 0,000        | 0,000         | 0,029        | 0,159        | 0,291        | 0,010        | 0,009         | 0,000        | 0,024         | 0,004         | 0,015        | 0,235        |
| Onygenales             | 0,013        | 0,007         | 0,000        | 0,000        | 0,000        | 0,000        | 0,000         | 0,030        | 0,000         | 0,004         | 0,000        | 0,000        |
| Phaeomoniellales       | 0,000        | 0,000         | 0,000        | 0,059        | 0,008        | 0,010        | 0,028         | 0,004        | 0,004         | 0,038         | 0,003        | 0,000        |
| Verrucariales          | 5,232        | 0,185         | 0,320        | 0,000        | 0,016        | 0,000        | 0,084         | 0,386        | 0,432         | 0,034         | 0,046        | 0,002        |
| <b>Lecanoromycetes</b> | <b>9,985</b> | <b>11,129</b> | <b>3,297</b> | <b>6,974</b> | <b>1,153</b> | <b>0,216</b> | <b>11,528</b> | <b>5,387</b> | <b>29,397</b> | <b>0,256</b>  | <b>0,144</b> | <b>0,021</b> |
| Acarosporales          | 0,040        | 0,000         | 0,042        | 0,015        | 0,013        | 0,014        | 0,000         | 0,015        | 0,055         | 0,002         | 0,009        | 0,000        |
| Baeomycetales          | 0,000        | 0,000         | 0,000        | 0,000        | 0,000        | 0,000        | 0,014         | 0,000        | 0,000         | 0,000         | 0,000        | 0,000        |
| Caliciales             | 0,479        | 0,116         | 0,019        | 0,010        | 0,035        | 0,002        | 0,000         | 0,000        | 0,004         | 0,000         | 0,000        | 0,002        |
| Lecanorales            | 0,240        | 0,082         | 0,045        | 0,010        | 0,035        | 0,010        | 0,314         | 0,364        | 0,844         | 0,005         | 0,002        | 0,000        |
| Lecideales             | 0,000        | 0,000         | 0,000        | 0,000        | 0,000        | 0,000        | 0,272         | 0,000        | 0,024         | 0,000         | 0,000        | 0,000        |
| Ostropales             | 0,000        | 0,000         | 0,000        | 0,010        | 0,000        | 0,000        | 0,005         | 0,000        | 0,000         | 0,002         | 0,002        | 0,000        |
| Peltigerales           | 0,013        | 0,000         | 0,000        | 0,000        | 0,000        | 0,002        | 0,000         | 0,000        | 0,000         | 0,000         | 0,000        | 0,000        |
| Pertusariales          | 0,000        | 0,000         | 0,003        | 0,000        | 0,019        | 0,002        | 0,005         | 0,000        | 0,000         | 0,002         | 0,000        | 0,000        |
| Rhizocarpales          | 0,000        | 0,000         | 0,000        | 0,000        | 0,000        | 0,000        | 0,005         | 0,000        | 0,004         | 0,000         | 0,000        | 0,000        |
| Teloschistales         | 7,655        | 10,156        | 2,394        | 5,893        | 0,800        | 0,099        | 3,689         | 4,014        | 27,407        | 0,131         | 0,065        | 0,016        |
| Trapeliales            | 0,000        | 0,000         | 0,000        | 0,005        | 0,000        | 0,000        | 0,028         | 0,004        | 0,000         | 0,007         | 0,011        | 0,000        |
| Umbilicariales         | 0,027        | 0,014         | 0,081        | 0,069        | 0,054        | 0,043        | 0,155         | 0,019        | 0,020         | 0,021         | 0,013        | 0,000        |
| <b>Leotiomyces</b>     | <b>5,139</b> | <b>2,864</b>  | <b>1,854</b> | <b>2,156</b> | <b>4,876</b> | <b>0,788</b> | <b>2,446</b>  | <b>9,156</b> | <b>4,591</b>  | <b>11,891</b> | <b>1,157</b> | <b>0,165</b> |
| Chaetomellales         | 0,000        | 0,034         | 0,000        | 0,000        | 0,000        | 0,000        | 0,000         | 0,000        | 0,000         | 0,000         | 0,000        | 0,000        |
| Erysiphales            | 0,080        | 0,178         | 0,152        | 0,421        | 2,152        | 0,247        | 0,005         | 0,063        | 0,141         | 0,000         | 0,082        | 0,005        |
| Helotiales             | 4,593        | 1,953         | 1,365        | 1,482        | 1,848        | 0,471        | 1,854         | 5,806        | 2,743         | 8,641         | 0,636        | 0,125        |
| Leotiales              | 0,000        | 0,007         | 0,000        | 0,000        | 0,005        | 0,000        | 0,066         | 0,007        | 0,024         | 0,013         | 0,003        | 0,000        |
| Marthamycetales        | 0,000        | 0,000         | 0,003        | 0,010        | 0,003        | 0,000        | 0,000         | 0,000        | 0,000         | 0,000         | 0,000        | 0,000        |
| Phacidiales            | 0,000        | 0,034         | 0,006        | 0,000        | 0,003        | 0,000        | 0,014         | 0,004        | 0,008         | 0,023         | 0,000        | 0,000        |
| Rhytismatales          | 0,013        | 0,000         | 0,000        | 0,000        | 0,000        | 0,002        | 0,014         | 0,267        | 0,149         | 0,059         | 0,035        | 0,004        |
| Thelebolales           | 0,266        | 0,281         | 0,071        | 0,005        | 0,003        | 0,005        | 0,047         | 1,688        | 0,679         | 0,007         | 0,007        | 0,005        |
| <b>Orbiliomyces</b>    | <b>0,067</b> | <b>0,014</b>  | <b>0,023</b> | <b>0,000</b> | <b>0,043</b> | <b>0,010</b> | <b>0,000</b>  | <b>0,000</b> | <b>0,027</b>  | <b>0,000</b>  | <b>0,000</b> | <b>0,000</b> |
| Orbiliales             | 0,067        | 0,014         | 0,013        | 0,000        | 0,030        | 0,002        | 0,000         | 0,000        | 0,027         | 0,000         | 0,000        | 0,000        |
| <b>Pezizomyces</b>     | <b>0,053</b> | <b>0,048</b>  | <b>0,016</b> | <b>0,050</b> | <b>0,059</b> | <b>0,026</b> | <b>0,005</b>  | <b>0,193</b> | <b>0,055</b>  | <b>0,023</b>  | <b>0,030</b> | <b>0,000</b> |
| Pezizales              | 0,053        | 0,041         | 0,013        | 0,050        | 0,048        | 0,024        | 0,005         | 0,122        | 0,043         | 0,005         | 0,012        | 0,000        |
| <b>Saccharomyces</b>   | <b>0,067</b> | <b>0,062</b>  | <b>0,081</b> | <b>0,020</b> | <b>0,011</b> | <b>0,017</b> | <b>0,019</b>  | <b>0,271</b> | <b>0,102</b>  | <b>0,082</b>  | <b>0,047</b> | <b>0,629</b> |
| Saccharomycetales      | 0,040        | 0,062         | 0,074        | 0,020        | 0,005        | 0,017        | 0,019         | 0,260        | 0,102         | 0,056         | 0,030        | 0,601        |



|               |                             |              |              |              |              |              |              |              |              |              |              |              |              |
|---------------|-----------------------------|--------------|--------------|--------------|--------------|--------------|--------------|--------------|--------------|--------------|--------------|--------------|--------------|
| Basidiomycota | <b>Sordariomycetes</b>      | <b>0,266</b> | <b>0,343</b> | <b>0,181</b> | <b>0,496</b> | <b>0,312</b> | <b>0,555</b> | <b>0,084</b> | <b>0,427</b> | <b>0,259</b> | <b>0,066</b> | <b>0,067</b> | <b>0,033</b> |
|               | Chaetosphaeriales           | 0,013        | 0,048        | 0,000        | 0,000        | 0,000        | 0,007        | 0,000        | 0,004        | 0,008        | 0,000        | 0,000        | 0,000        |
|               | Coniochaetales              | 0,000        | 0,000        | 0,000        | 0,000        | 0,000        | 0,000        | 0,000        | 0,000        | 0,004        | 0,002        | 0,001        | 0,000        |
|               | Diaporthales                | 0,000        | 0,007        | 0,042        | 0,367        | 0,210        | 0,449        | 0,005        | 0,022        | 0,051        | 0,043        | 0,034        | 0,025        |
|               | Glomerellales               | 0,013        | 0,007        | 0,003        | 0,000        | 0,000        | 0,000        | 0,000        | 0,037        | 0,004        | 0,011        | 0,004        | 0,000        |
|               | Hypocreales                 | 0,107        | 0,082        | 0,052        | 0,069        | 0,046        | 0,055        | 0,038        | 0,178        | 0,126        | 0,011        | 0,021        | 0,005        |
|               | Microascales                | 0,000        | 0,000        | 0,006        | 0,000        | 0,000        | 0,000        | 0,000        | 0,011        | 0,000        | 0,000        | 0,000        | 0,000        |
|               | Ophiostomatales             | 0,000        | 0,007        | 0,000        | 0,000        | 0,000        | 0,000        | 0,000        | 0,004        | 0,000        | 0,000        | 0,000        | 0,000        |
|               | Sordariales                 | 0,000        | 0,007        | 0,019        | 0,000        | 0,000        | 0,000        | 0,005        | 0,019        | 0,008        | 0,000        | 0,001        | 0,000        |
|               | Togniniales                 | 0,000        | 0,000        | 0,000        | 0,000        | 0,000        | 0,002        | 0,000        | 0,000        | 0,000        | 0,000        | 0,000        | 0,000        |
|               | Xenospadicoidales           | 0,000        | 0,000        | 0,000        | 0,000        | 0,000        | 0,000        | 0,000        | 0,000        | 0,004        | 0,000        | 0,000        | 0,000        |
|               | Xylariales                  | 0,067        | 0,082        | 0,006        | 0,005        | 0,019        | 0,000        | 0,019        | 0,093        | 0,008        | 0,000        | 0,000        | 0,002        |
|               | <b>Taphrinomycetes</b>      | <b>0,253</b> | <b>0,116</b> | <b>0,210</b> | <b>3,013</b> | <b>6,802</b> | <b>2,304</b> | <b>0,488</b> | <b>0,382</b> | <b>1,946</b> | <b>9,158</b> | <b>5,735</b> | <b>1,379</b> |
|               | Taphrinales                 | 0,240        | 0,116        | 0,204        | 2,964        | 6,683        | 2,302        | 0,488        | 0,382        | 1,942        | 7,805        | 5,707        | 1,378        |
|               | Unclassified                | 10,451       | 10,683       | 12,315       | 19,935       | 13,272       | 13,606       | 17,635       | 11,445       | 5,427        | 17,121       | 17,321       | 6,033        |
|               | Symbiotaphrinales           | 0,000        | 0,000        | 0,000        | 0,000        | 0,003        | 0,000        | 0,000        | 0,000        | 0,000        | 0,000        | 0,000        | 0,000        |
|               | <b>Agaricomycetes</b>       | <b>2,077</b> | <b>0,987</b> | <b>0,201</b> | <b>0,322</b> | <b>0,253</b> | <b>0,197</b> | <b>0,169</b> | <b>2,297</b> | <b>0,608</b> | <b>0,077</b> | <b>0,129</b> | <b>0,019</b> |
|               | Agaricales                  | 0,746        | 0,459        | 0,049        | 0,124        | 0,051        | 0,050        | 0,108        | 1,974        | 0,314        | 0,059        | 0,093        | 0,014        |
|               | Amylocorticiales            | 0,000        | 0,007        | 0,000        | 0,000        | 0,000        | 0,000        | 0,000        | 0,026        | 0,000        | 0,000        | 0,000        | 0,000        |
|               | Atheliales                  | 0,000        | 0,007        | 0,000        | 0,000        | 0,000        | 0,000        | 0,000        | 0,004        | 0,004        | 0,000        | 0,000        | 0,000        |
|               | Auriculariales              | 0,027        | 0,000        | 0,003        | 0,005        | 0,003        | 0,029        | 0,005        | 0,011        | 0,020        | 0,000        | 0,001        | 0,000        |
|               | Boletales                   | 0,013        | 0,014        | 0,003        | 0,000        | 0,003        | 0,000        | 0,000        | 0,007        | 0,020        | 0,000        | 0,010        | 0,000        |
|               | Cantharellales              | 0,093        | 0,055        | 0,013        | 0,000        | 0,003        | 0,002        | 0,009        | 0,067        | 0,020        | 0,000        | 0,001        | 0,000        |
|               | Corticiales                 | 0,040        | 0,021        | 0,003        | 0,015        | 0,046        | 0,010        | 0,000        | 0,000        | 0,047        | 0,002        | 0,003        | 0,000        |
|               | Gloeophyllales              | 0,000        | 0,000        | 0,000        | 0,000        | 0,000        | 0,000        | 0,000        | 0,000        | 0,008        | 0,000        | 0,000        | 0,000        |
|               | Gomphales                   | 0,000        | 0,000        | 0,000        | 0,000        | 0,000        | 0,000        | 0,000        | 0,007        | 0,000        | 0,000        | 0,000        | 0,000        |
|               | Hymenochaetales             | 0,040        | 0,021        | 0,000        | 0,005        | 0,005        | 0,002        | 0,000        | 0,026        | 0,008        | 0,000        | 0,000        | 0,000        |
|               | Phallales                   | 0,067        | 0,000        | 0,000        | 0,000        | 0,000        | 0,000        | 0,000        | 0,004        | 0,000        | 0,000        | 0,000        | 0,000        |
|               | Polyporales                 | 0,599        | 0,206        | 0,094        | 0,139        | 0,108        | 0,084        | 0,000        | 0,100        | 0,094        | 0,004        | 0,007        | 0,002        |
|               | Russulales                  | 0,027        | 0,110        | 0,003        | 0,015        | 0,024        | 0,014        | 0,000        | 0,026        | 0,047        | 0,005        | 0,001        | 0,000        |
|               | Sebacinales                 | 0,000        | 0,000        | 0,003        | 0,000        | 0,000        | 0,000        | 0,009        | 0,004        | 0,008        | 0,000        | 0,000        | 0,000        |
|               | Thelephorales               | 0,120        | 0,007        | 0,013        | 0,000        | 0,003        | 0,000        | 0,005        | 0,004        | 0,004        | 0,000        | 0,001        | 0,000        |
|               | Trechisporales              | 0,053        | 0,007        | 0,000        | 0,000        | 0,000        | 0,000        | 0,009        | 0,011        | 0,000        | 0,000        | 0,001        | 0,000        |
|               | <b>Agaricostilbomycetes</b> | <b>0,186</b> | <b>0,110</b> | <b>0,366</b> | <b>0,074</b> | <b>0,420</b> | <b>0,459</b> | <b>0,033</b> | <b>0,096</b> | <b>0,286</b> | <b>0,030</b> | <b>0,101</b> | <b>0,004</b> |

|                    |                            |              |              |              |              |              |              |              |              |              |              |              |              |
|--------------------|----------------------------|--------------|--------------|--------------|--------------|--------------|--------------|--------------|--------------|--------------|--------------|--------------|--------------|
|                    | Agaricostilbales           | 0,160        | 0,082        | 0,233        | 0,040        | 0,377        | 0,135        | 0,033        | 0,074        | 0,255        | 0,007        | 0,009        | 0,004        |
|                    | <b>Atractiellomycetes</b>  | <b>0,000</b> | <b>0,000</b> | <b>0,000</b> | <b>0,010</b> | <b>0,000</b> | <b>0,002</b> | <b>0,000</b> | <b>0,000</b> | <b>0,000</b> | <b>0,000</b> | <b>0,004</b> | <b>0,000</b> |
|                    | Atractiellales             | 0,000        | 0,000        | 0,000        | 0,000        | 0,000        | 0,002        | 0,000        | 0,000        | 0,000        | 0,000        | 0,000        | 0,000        |
|                    | <b>Cystobasidiomycetes</b> | <b>0,932</b> | <b>0,726</b> | <b>1,288</b> | <b>0,748</b> | <b>0,412</b> | <b>1,999</b> | <b>0,221</b> | <b>1,028</b> | <b>1,864</b> | <b>0,381</b> | <b>0,494</b> | <b>0,380</b> |
|                    | Cystobasidiales            | 0,240        | 0,171        | 0,579        | 0,030        | 0,013        | 0,058        | 0,066        | 0,482        | 1,734        | 0,029        | 0,009        | 0,026        |
|                    | Erythrobasidiales          | 0,067        | 0,021        | 0,019        | 0,000        | 0,005        | 0,310        | 0,000        | 0,004        | 0,000        | 0,002        | 0,000        | 0,000        |
|                    | <b>Dacrymycetes</b>        | <b>0,013</b> | <b>0,027</b> | <b>0,000</b> | <b>0,000</b> | <b>0,000</b> | <b>0,000</b> | <b>0,000</b> | <b>0,004</b> | <b>0,000</b> | <b>0,000</b> | <b>0,001</b> | <b>0,000</b> |
|                    | Dacrymycetales             | 0,013        | 0,007        | 0,000        | 0,000        | 0,000        | 0,000        | 0,000        | 0,004        | 0,000        | 0,000        | 0,001        | 0,000        |
|                    | <b>Exobasidiomycetes</b>   | <b>0,226</b> | <b>0,089</b> | <b>0,094</b> | <b>2,280</b> | <b>3,176</b> | <b>1,007</b> | <b>0,042</b> | <b>0,011</b> | <b>0,027</b> | <b>0,091</b> | <b>0,060</b> | <b>0,007</b> |
|                    | Entylomatales              | 0,000        | 0,000        | 0,000        | 0,000        | 0,000        | 0,000        | 0,005        | 0,007        | 0,004        | 0,004        | 0,000        | 0,000        |
|                    | Exobasidiales              | 0,013        | 0,007        | 0,000        | 0,005        | 0,003        | 0,000        | 0,033        | 0,004        | 0,024        | 0,082        | 0,049        | 0,005        |
|                    | Golubeviales               | 0,000        | 0,000        | 0,000        | 0,000        | 0,000        | 0,000        | 0,000        | 0,000        | 0,000        | 0,002        | 0,000        | 0,000        |
|                    | Microstromatales           | 0,200        | 0,082        | 0,094        | 2,250        | 3,149        | 1,007        | 0,000        | 0,000        | 0,000        | 0,000        | 0,010        | 0,002        |
|                    | <b>Malasseziomycetes</b>   | <b>0,000</b> | <b>0,000</b> | <b>0,003</b> | <b>0,000</b> | <b>0,032</b> | <b>0,007</b> | <b>0,000</b> | <b>0,004</b> | <b>0,027</b> | <b>0,000</b> | <b>0,000</b> | <b>0,002</b> |
|                    | Malasseziales              | 0,000        | 0,000        | 0,003        | 0,000        | 0,030        | 0,007        | 0,000        | 0,004        | 0,027        | 0,000        | 0,000        | 0,002        |
|                    | <b>Microbotryomycetes</b>  | <b>0,679</b> | <b>0,706</b> | <b>0,692</b> | <b>0,129</b> | <b>0,027</b> | <b>0,190</b> | <b>0,352</b> | <b>2,538</b> | <b>1,613</b> | <b>0,030</b> | <b>0,010</b> | <b>0,004</b> |
|                    | Kriegeriales               | 0,546        | 0,418        | 0,586        | 0,000        | 0,000        | 0,002        | 0,207        | 1,670        | 1,428        | 0,002        | 0,001        | 0,000        |
|                    | Leucosporidiales           | 0,040        | 0,116        | 0,016        | 0,000        | 0,005        | 0,000        | 0,014        | 0,364        | 0,067        | 0,025        | 0,000        | 0,000        |
|                    | Microbotryales             | 0,040        | 0,062        | 0,013        | 0,000        | 0,000        | 0,000        | 0,009        | 0,063        | 0,024        | 0,000        | 0,001        | 0,000        |
|                    | Sporidiobolales            | 0,013        | 0,055        | 0,049        | 0,114        | 0,019        | 0,183        | 0,014        | 0,096        | 0,027        | 0,000        | 0,008        | 0,004        |
|                    | <b>Pucciniomycetes</b>     | <b>0,213</b> | <b>0,219</b> | <b>0,039</b> | <b>0,248</b> | <b>1,086</b> | <b>0,368</b> | <b>0,314</b> | <b>0,434</b> | <b>1,263</b> | <b>1,457</b> | <b>0,205</b> | <b>0,580</b> |
|                    | Pucciniales                | 0,213        | 0,219        | 0,039        | 0,248        | 1,080        | 0,365        | 0,310        | 0,434        | 1,263        | 1,454        | 0,198        | 0,578        |
|                    | Septobasidiales            | 0,000        | 0,000        | 0,000        | 0,000        | 0,000        | 0,002        | 0,000        | 0,000        | 0,000        | 0,000        | 0,004        | 0,002        |
|                    | <b>Spiculogloeomycetes</b> | <b>0,013</b> | <b>0,000</b> | <b>0,003</b> | <b>0,025</b> | <b>0,000</b> | <b>0,000</b> | <b>0,000</b> | <b>0,000</b> | <b>0,024</b> | <b>0,000</b> | <b>0,001</b> | <b>0,000</b> |
|                    | Cystofilobasidiales        | 0,120        | 0,247        | 0,841        | 0,020        | 0,048        | 0,824        | 0,047        | 2,604        | 0,742        | 0,258        | 0,072        | 0,079        |
|                    | Filobasidiales             | 0,519        | 0,699        | 2,427        | 0,352        | 0,504        | 2,857        | 0,169        | 2,693        | 0,734        | 0,267        | 0,422        | 0,051        |
|                    | Holtermanniales            | 0,013        | 0,027        | 0,013        | 0,000        | 0,000        | 0,000        | 0,000        | 0,122        | 0,020        | 0,000        | 0,006        | 0,000        |
|                    | <b>Tremellomycetes</b>     | <b>1,891</b> | <b>1,727</b> | <b>4,465</b> | <b>2,686</b> | <b>2,643</b> | <b>5,278</b> | <b>1,080</b> | <b>8,663</b> | <b>3,433</b> | <b>1,885</b> | <b>0,868</b> | <b>0,297</b> |
|                    | Tremellales                | 1,145        | 0,500        | 0,550        | 2,097        | 1,886        | 1,516        | 0,667        | 1,447        | 1,040        | 1,329        | 0,334        | 0,146        |
|                    | Trichosporonales           | 0,000        | 0,000        | 0,000        | 0,000        | 0,003        | 0,000        | 0,000        | 0,037        | 0,016        | 0,000        | 0,000        | 0,000        |
|                    | <b>Ustilaginomycetes</b>   | <b>0,027</b> | <b>0,075</b> | <b>0,006</b> | <b>0,025</b> | <b>0,194</b> | <b>0,002</b> | <b>0,000</b> | <b>0,000</b> | <b>0,024</b> | <b>0,002</b> | <b>0,002</b> | <b>0,004</b> |
|                    | Urocystidales              | 0,027        | 0,055        | 0,000        | 0,005        | 0,137        | 0,000        | 0,000        | 0,000        | 0,024        | 0,000        | 0,002        | 0,004        |
|                    | Ustilaginales              | 0,000        | 0,021        | 0,006        | 0,020        | 0,057        | 0,002        | 0,000        | 0,000        | 0,000        | 0,002        | 0,000        | 0,000        |
| Blastocladiomycota | <b>Blastocladiomycetes</b> | <b>0,013</b> | <b>0,007</b> | <b>0,000</b> |

|                 |                               |              |              |              |              |              |              |              |              |              |              |              |              |
|-----------------|-------------------------------|--------------|--------------|--------------|--------------|--------------|--------------|--------------|--------------|--------------|--------------|--------------|--------------|
|                 | Blastocladales                | 0,013        | 0,007        | 0,000        | 0,000        | 0,000        | 0,000        | 0,000        | 0,000        | 0,000        | 0,000        | 0,000        | 0,000        |
|                 | <b>Chytridiomycetes</b>       | <b>0,772</b> | <b>1,775</b> | <b>0,388</b> | <b>0,000</b> | <b>0,003</b> | <b>0,000</b> | <b>0,014</b> | <b>1,336</b> | <b>0,149</b> | <b>0,000</b> | <b>0,000</b> | <b>0,000</b> |
|                 | Rhizophlyctidales             | 0,000        | 0,000        | 0,003        | 0,000        | 0,000        | 0,000        | 0,000        | 0,000        | 0,000        | 0,000        | 0,000        | 0,000        |
|                 | Rhizophydiales                | 0,000        | 0,041        | 0,003        | 0,000        | 0,000        | 0,000        | 0,000        | 0,004        | 0,000        | 0,000        | 0,000        | 0,000        |
| Chytridiomycota | Spizellomycetales             | 0,692        | 1,651        | 0,369        | 0,000        | 0,003        | 0,000        | 0,009        | 1,206        | 0,137        | 0,000        | 0,000        | 0,000        |
|                 | <b>Monoblepharidomycetes</b>  | <b>0,027</b> | <b>0,000</b> |
|                 | Monoblepharidales             | 0,013        | 0,000        | 0,000        | 0,000        | 0,000        | 0,000        | 0,000        | 0,000        | 0,000        | 0,000        | 0,000        | 0,000        |
|                 | <b>Neocallimastigomycetes</b> | <b>0,000</b> | <b>0,000</b> | <b>0,000</b> | <b>0,005</b> | <b>0,000</b> | <b>0,002</b> |
|                 | Neocallimastigales            | 0,000        | 0,000        | 0,000        | 0,005        | 0,000        | 0,000        | 0,000        | 0,000        | 0,000        | 0,000        | 0,000        | 0,002        |
|                 | <b>Glomeromycetes</b>         | <b>0,107</b> | <b>0,048</b> | <b>0,026</b> | <b>0,030</b> | <b>0,000</b> | <b>0,000</b> | <b>0,056</b> | <b>0,033</b> | <b>0,000</b> | <b>0,000</b> | <b>0,000</b> | <b>0,000</b> |
|                 | Diversisporales               | 0,080        | 0,034        | 0,006        | 0,000        | 0,000        | 0,000        | 0,028        | 0,015        | 0,000        | 0,000        | 0,000        | 0,000        |
|                 | Glomerales                    | 0,013        | 0,007        | 0,003        | 0,025        | 0,000        | 0,000        | 0,009        | 0,007        | 0,000        | 0,000        | 0,000        | 0,000        |
| Mucoromycota    | Paraglomerales                | 0,000        | 0,000        | 0,000        | 0,000        | 0,000        | 0,000        | 0,000        | 0,004        | 0,000        | 0,000        | 0,000        | 0,000        |
|                 | <b>Mortierellomycetes</b>     | <b>0,027</b> | <b>0,021</b> | <b>0,003</b> | <b>0,005</b> | <b>0,003</b> | <b>0,000</b> | <b>0,000</b> | <b>0,007</b> | <b>0,000</b> | <b>0,007</b> | <b>0,003</b> | <b>0,000</b> |
|                 | Mortierellales                | 0,027        | 0,021        | 0,003        | 0,005        | 0,003        | 0,000        | 0,000        | 0,004        | 0,000        | 0,007        | 0,002        | 0,000        |
|                 | <b>Mucoromycetes</b>          | <b>0,027</b> | <b>0,110</b> | <b>0,003</b> | <b>0,015</b> | <b>0,054</b> | <b>0,005</b> | <b>0,005</b> | <b>0,048</b> | <b>0,027</b> | <b>0,021</b> | <b>0,006</b> | <b>0,005</b> |
|                 | Mucorales                     | 0,027        | 0,110        | 0,003        | 0,015        | 0,054        | 0,005        | 0,005        | 0,048        | 0,027        | 0,021        | 0,006        | 0,005        |

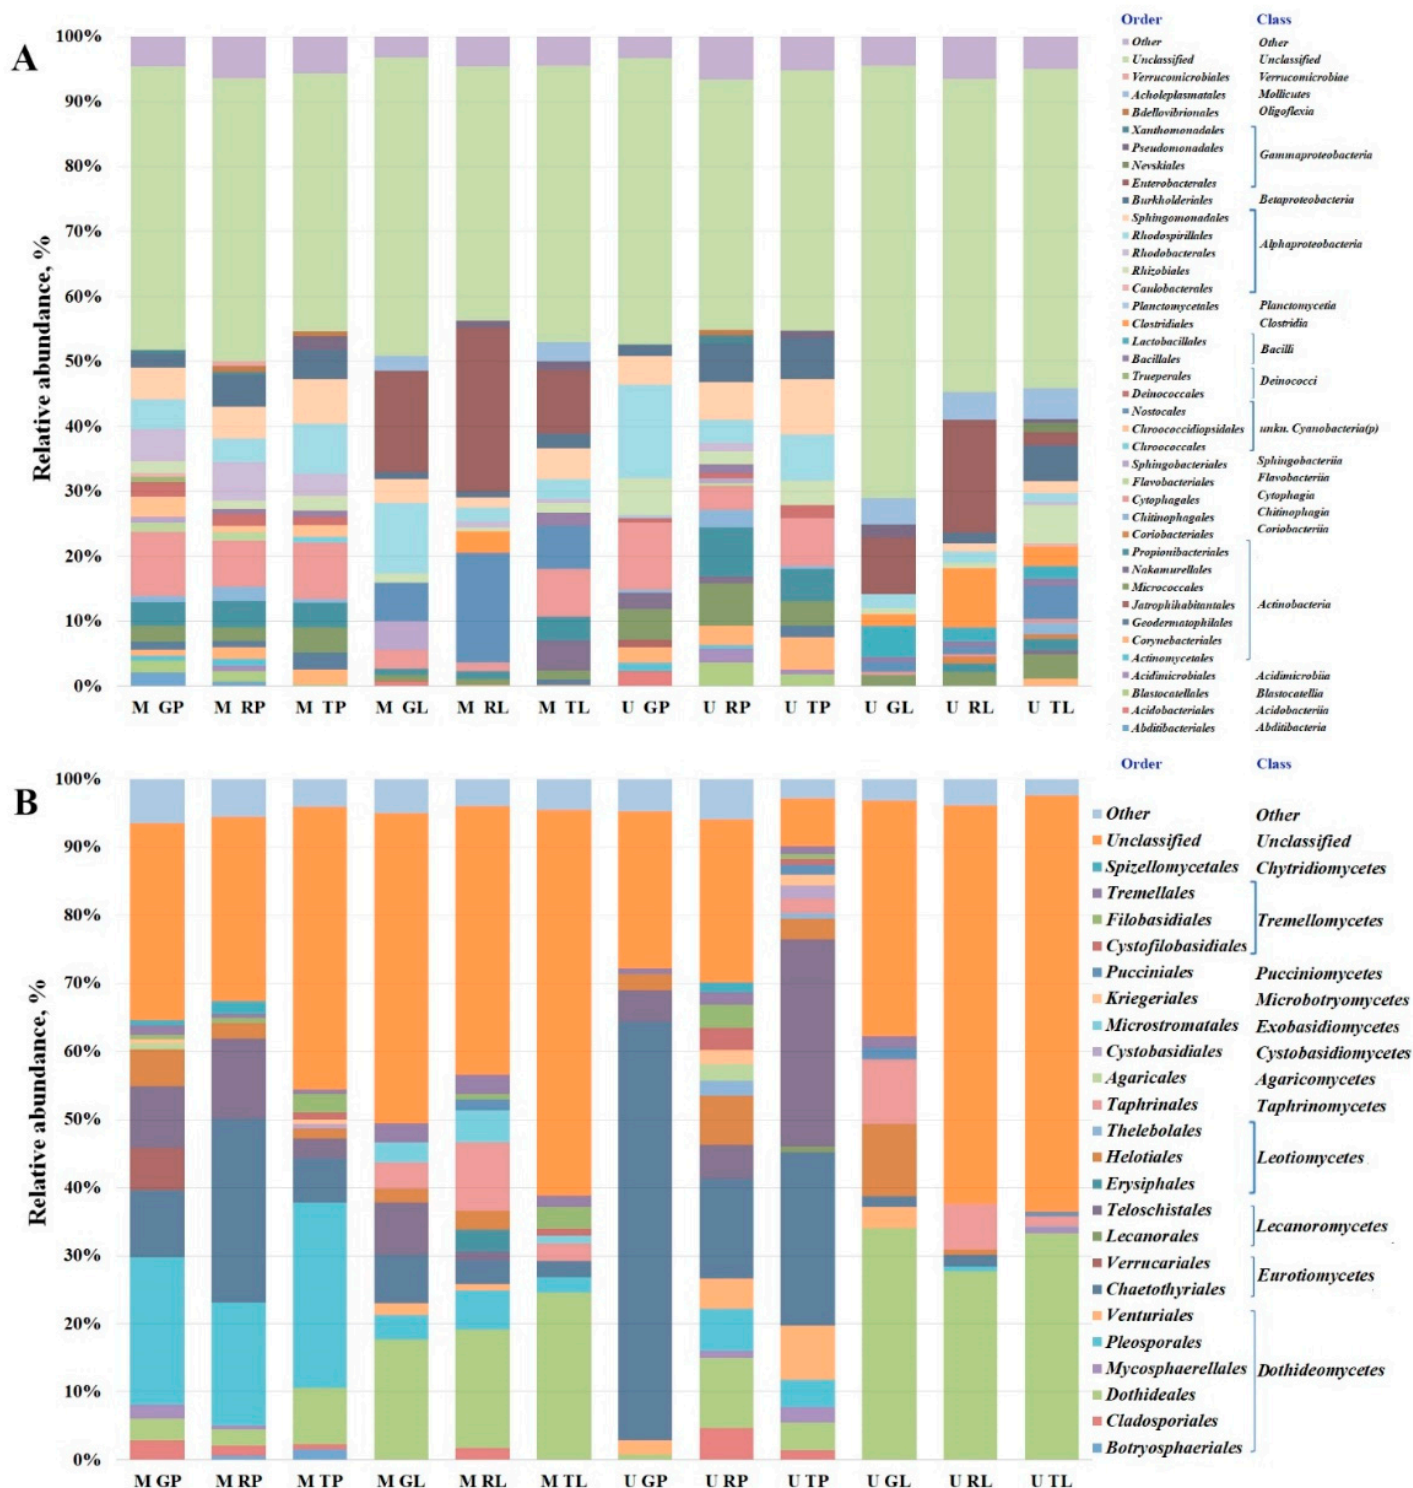

**Figure S1.** The relative abundance (%) of the most pronounced different classes and orders of bacteria (a) and fungi (b) recovered in biotopes of functional zones of Moscow and Murmansk. The classes/orders with relative abundance  $\geq$  1% of the reads per given sample were included.

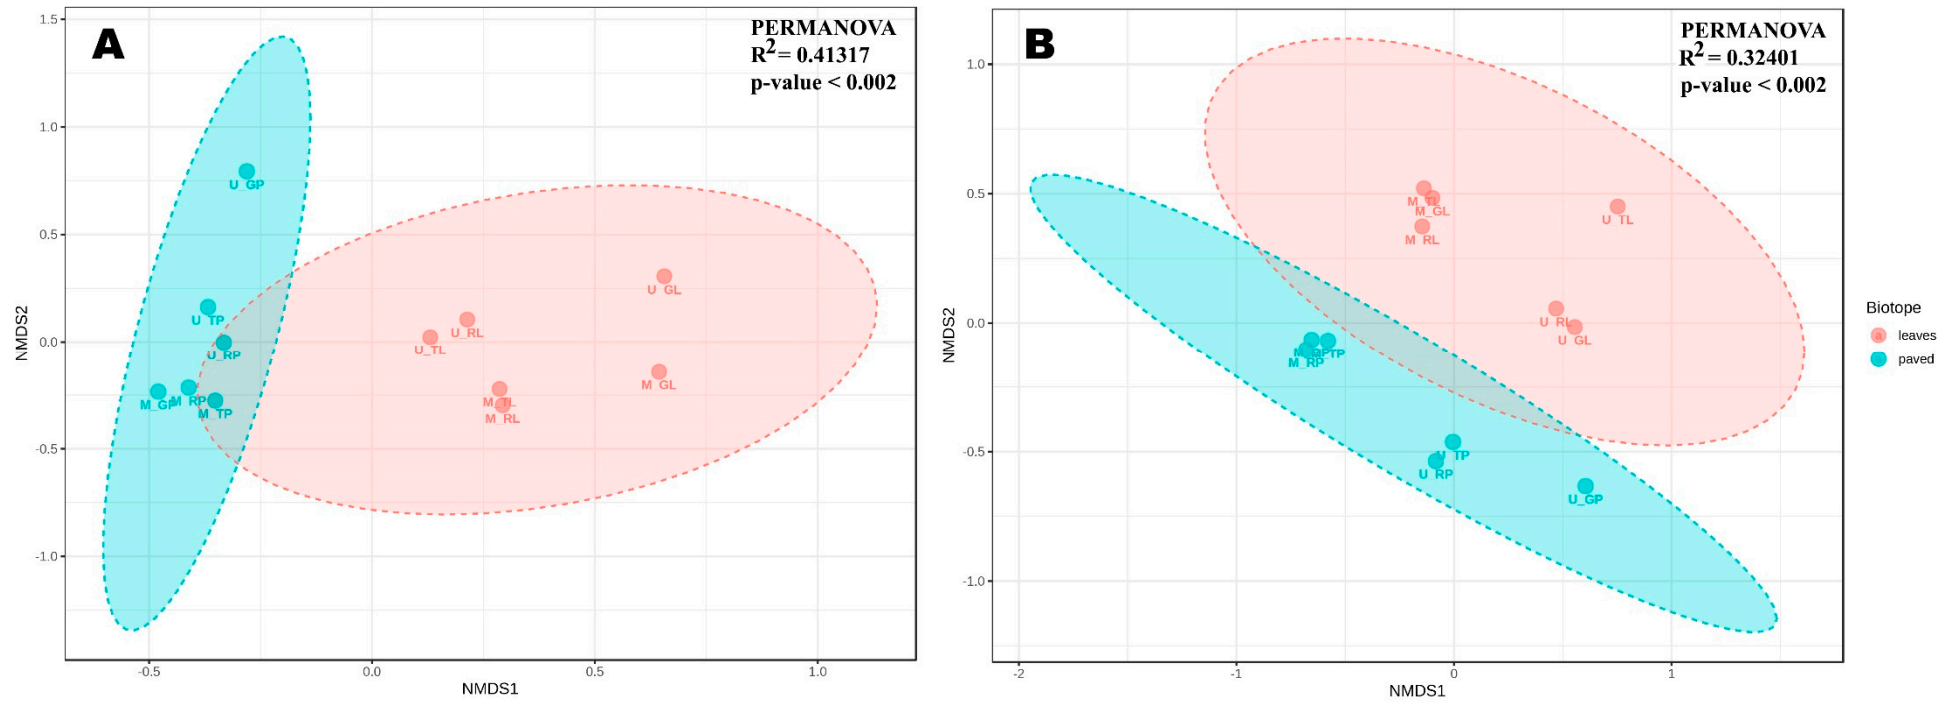

**Figure S2.** Non-metric multidimensional scaling diagram showing bacterial (A) and fungal (B) composition differences obtained among the 12 sampling sites

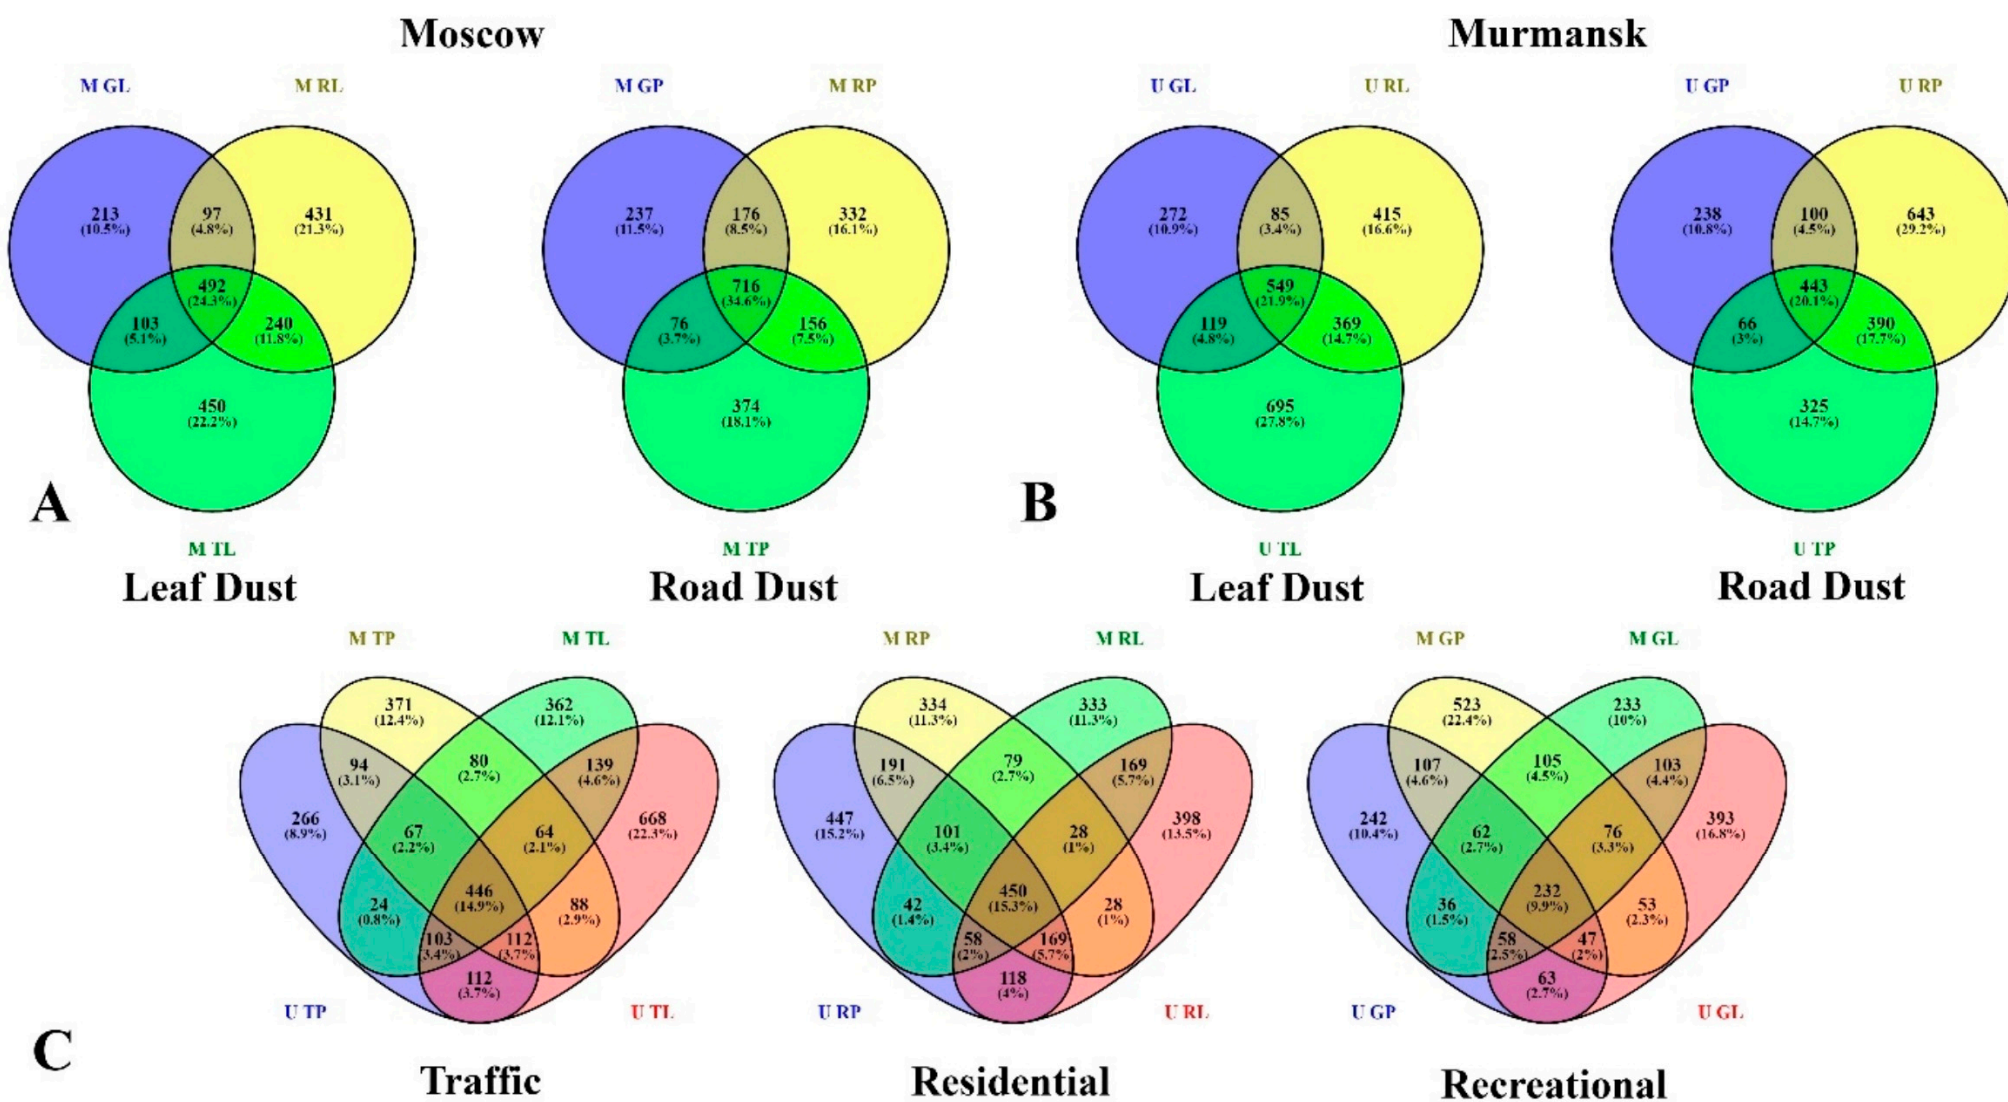

**Figure S3.** Venn diagrams illustrating the number of unique and shared bacterial OTUs among two biotopes of Moscow (A) and Murmansk(B) detected in three urban sites of cities(C): recreational, residential and traffic zones.



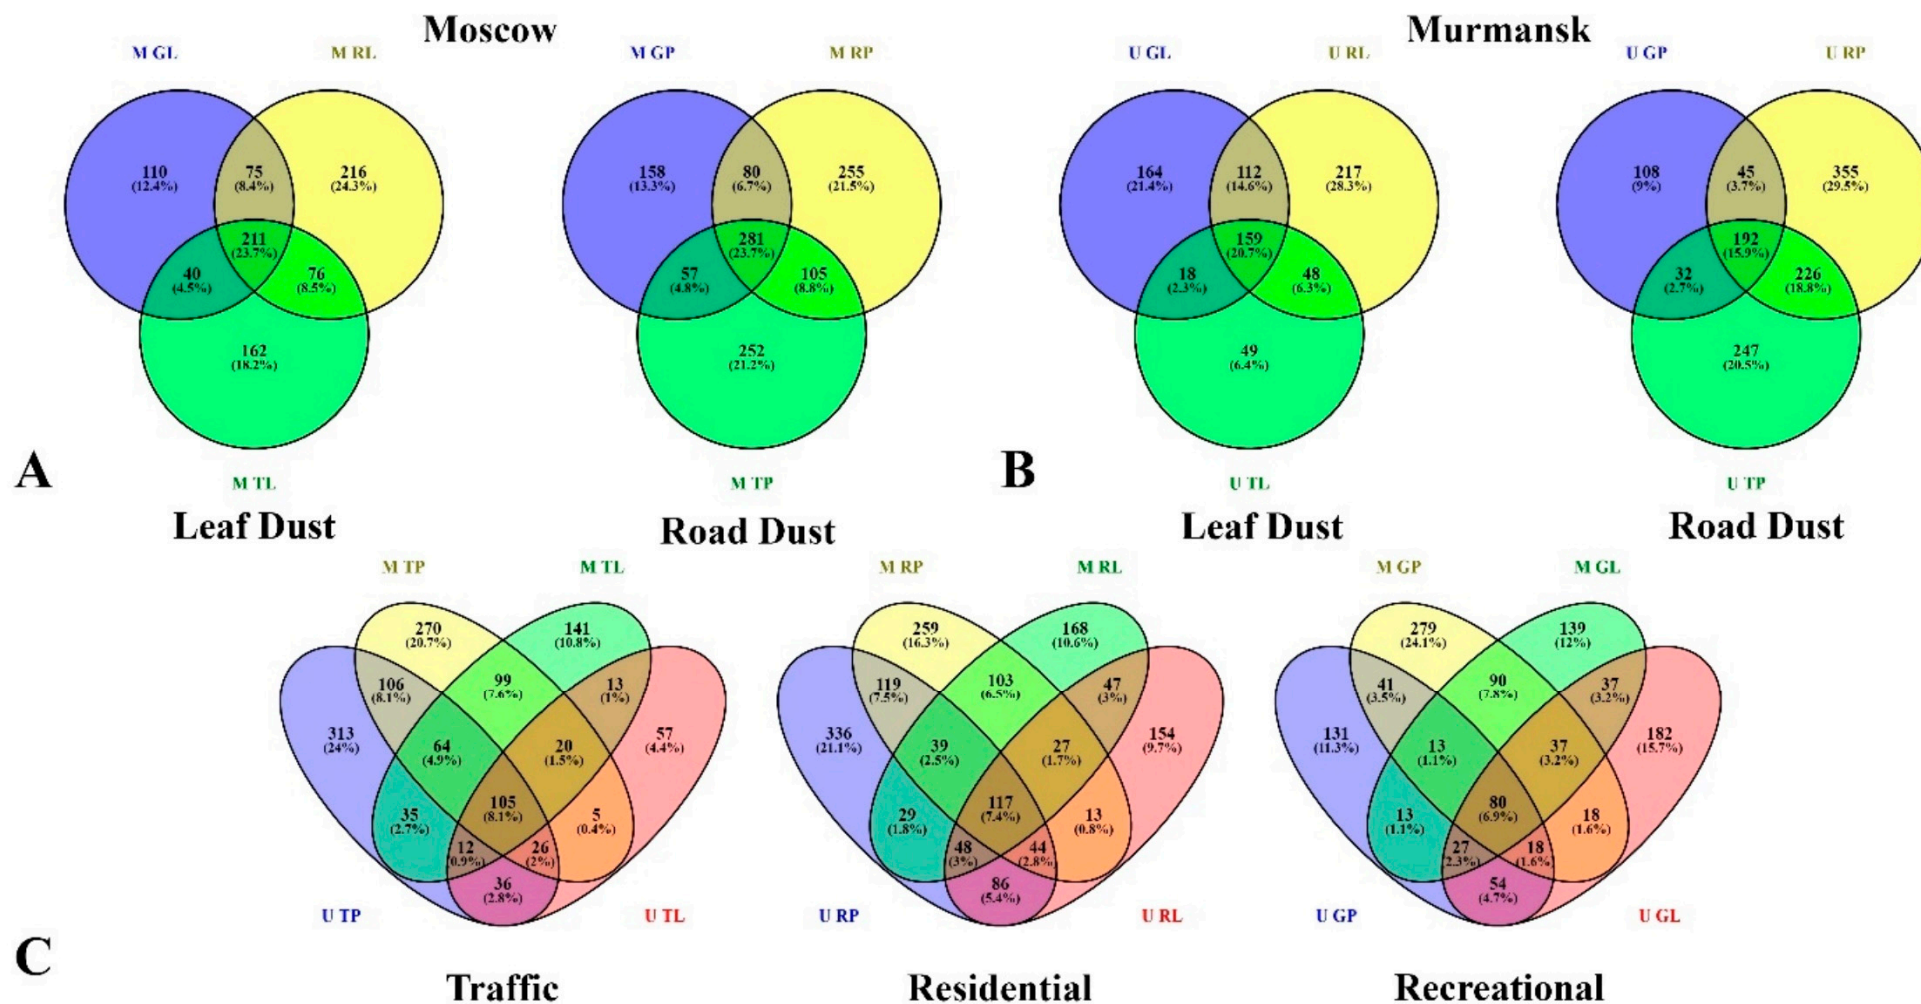

**Figure S4.** Venn diagrams illustrating the number of unique and shared fungal OTUs among two biotopes of Moscow (A) and Murmansk(B) detected in three urban sites of cities(C): recreational, residential and traffic zones.

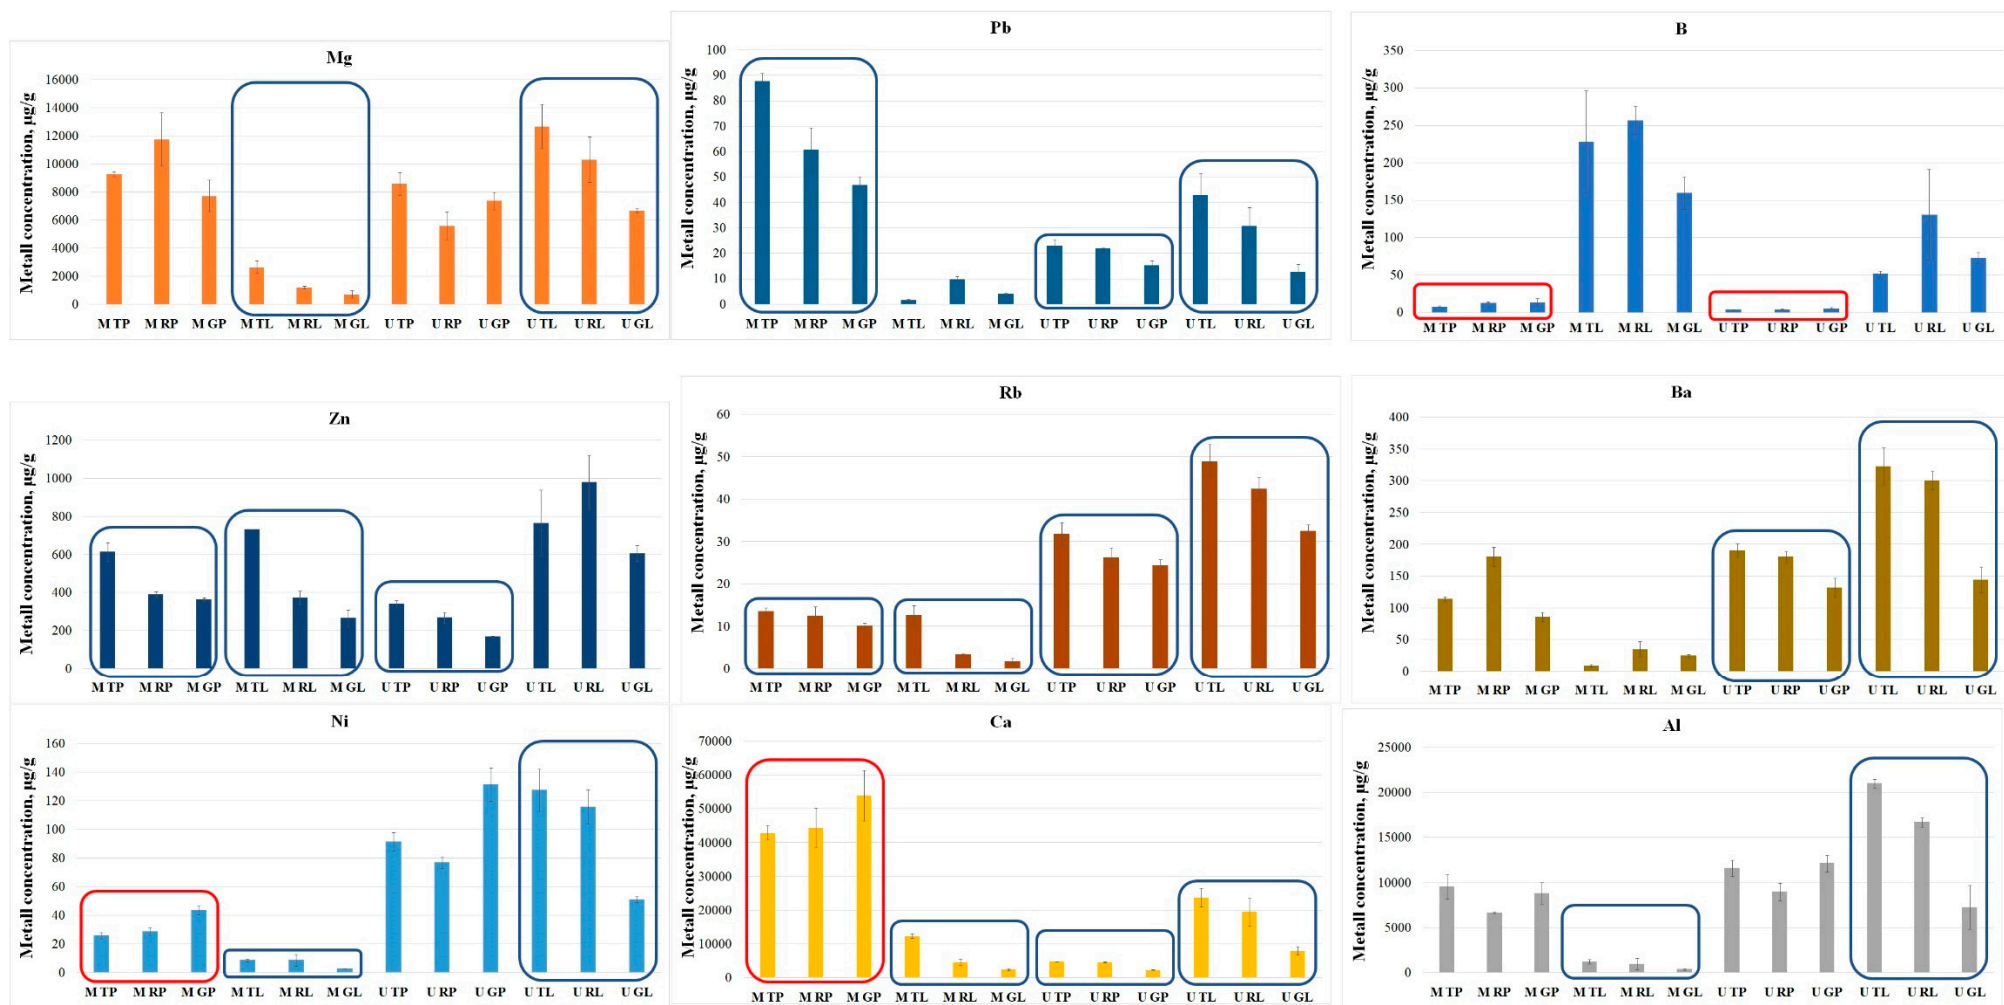

**Figure S5.** Content of the metal in biotopes of functional zones of Murmansk and Moscow.

M TP, road dust from Moscow traffic zone; M RP, road dust from Moscow residential zone; M GP, road dust from Moscow recreational zone; U TP, road dust from Murmansk traffic zone; U RP, road dust from Murmansk residential zone; U GP, road dust from Murmansk recreational zone; M TL, leaf dust from Moscow traffic zone; M RL, leaf dust from Moscow residential zone; M GL, leaf dust from Moscow recreational zone; U TL, leaf dust from Murmansk traffic zone; U RL, leaf dust from Murmansk residential zone; U GL, leaf dust from Murmansk recreational zone. The red box shows the increase, blue box – decrease.



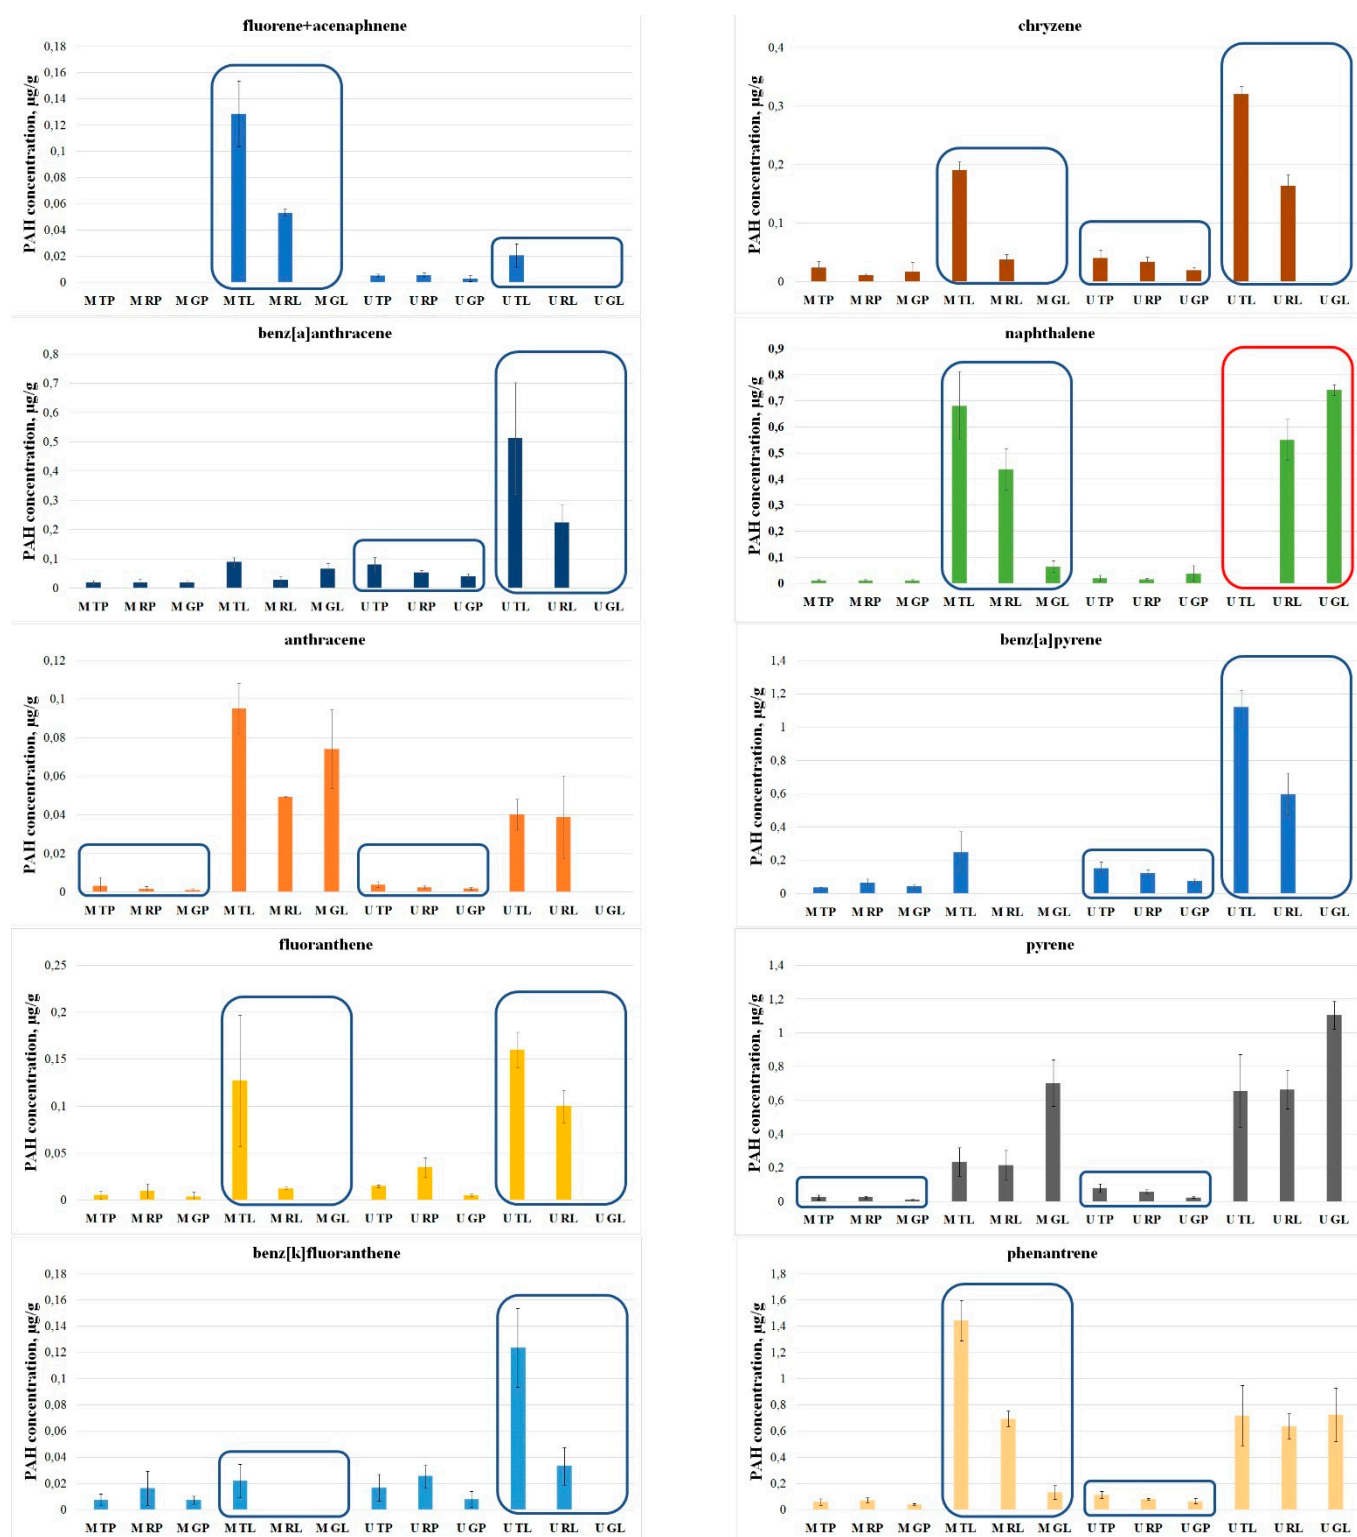

**Figure S6.** Content of the PAHs in biotopes of functional zones of Murmansk and Moscow.

M TP, road dust from Moscow traffic zone; M RP, road dust from Moscow residential zone; M GP, road dust from Moscow recreational zone; U TP, road dust from Murmansk traffic zone; U RP, road dust from Murmansk residential zone; U GP, road dust from Murmansk recreational zone; M TL, leaf dust from Moscow traffic zone; M RL, leaf dust from Moscow residential zone; M GL, leaf dust from Moscow recreational zone; U TL, leaf dust from Murmansk traffic zone; U RL, leaf dust from Murmansk residential zone; U GL, leaf dust from Murmansk recreational zone. The red box shows the increase, blue box – decrease.

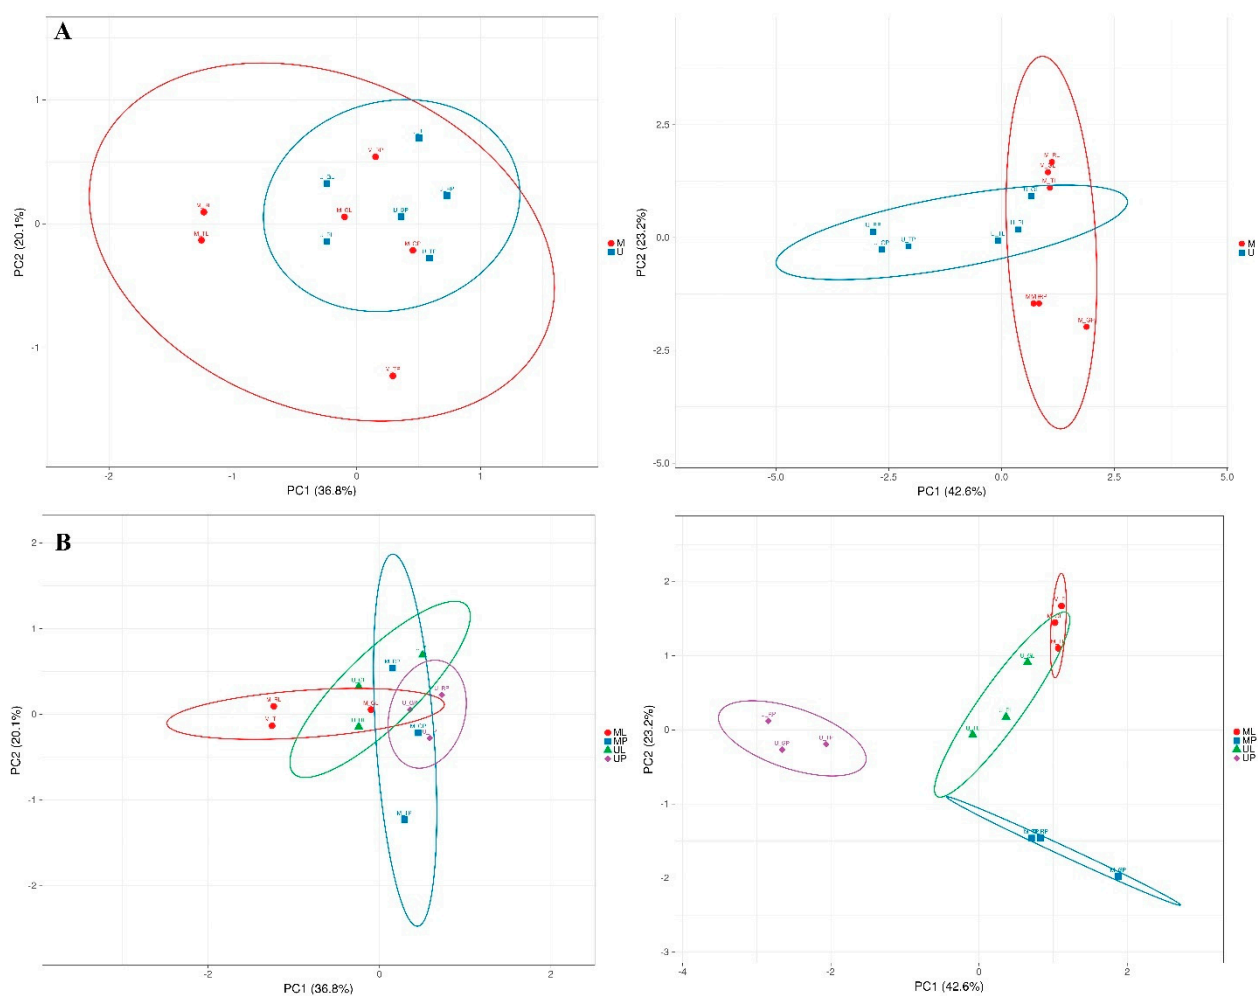

**Figure S7.** Principal component analysis (PCA) of PAHs (A) and metals (B) composition in biotopes of functional zones of Murmansk and Moscow.  
M-Moscow, U – Murmansk, MP – road dust of Moscow, ML – leaf dust of Moscow, UP – road dust of Murmansk, UL – leaf dust of Murmansk.

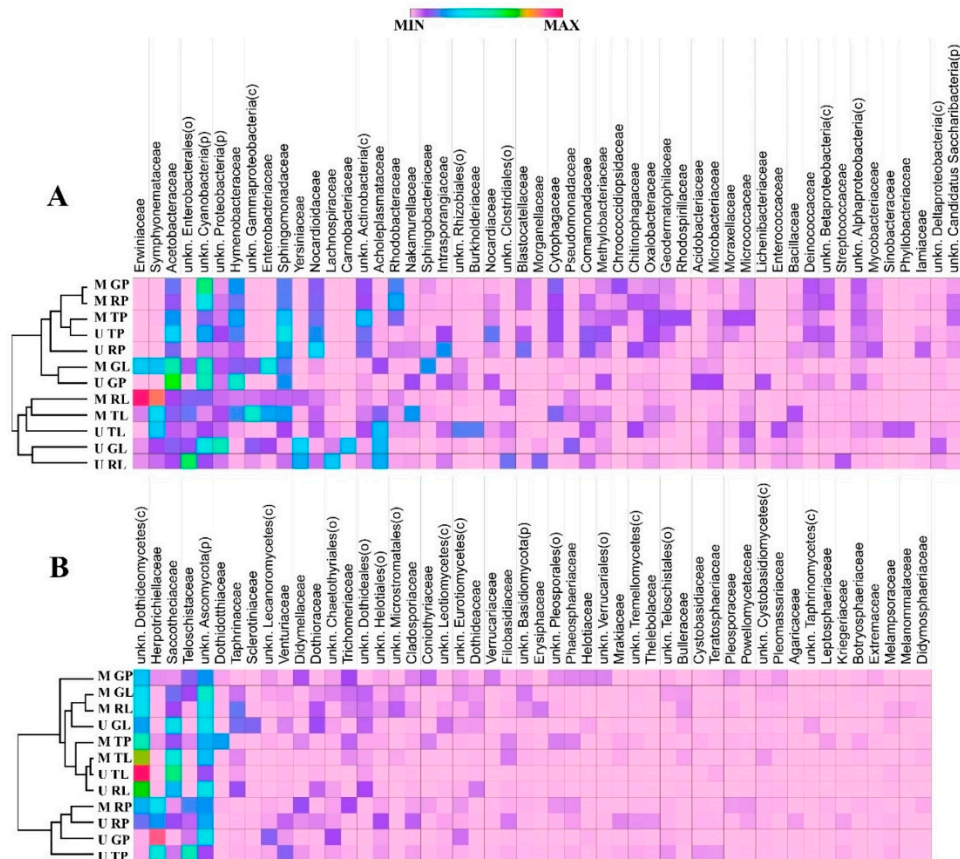

**Figure S8.** Heat maps of bacterial (A) and fungal (B) species in microbiome of biotopes of functional zones of Murmansk and Moscow.

M TP, road dust from Moscow traffic zone; M RP, road dust from Moscow residential zone; M GP, road dust from Moscow recreational zone; U TP, road dust from Murmansk traffic zone; U RP, road dust from Murmansk residential zone; U GP, road dust from Murmansk recreational zone; M TL, leaf dust from Moscow traffic zone; M RL, leaf dust from Moscow residential zone; M GL, leaf dust from Moscow recreational zone; U TL, leaf dust from Murmansk traffic zone; U RL, leaf dust from Murmansk residential zone; U GL, leaf dust from Murmansk recreational zone. Color code from pink (MIN) to red (MAX) depicts relative amount of respective group.

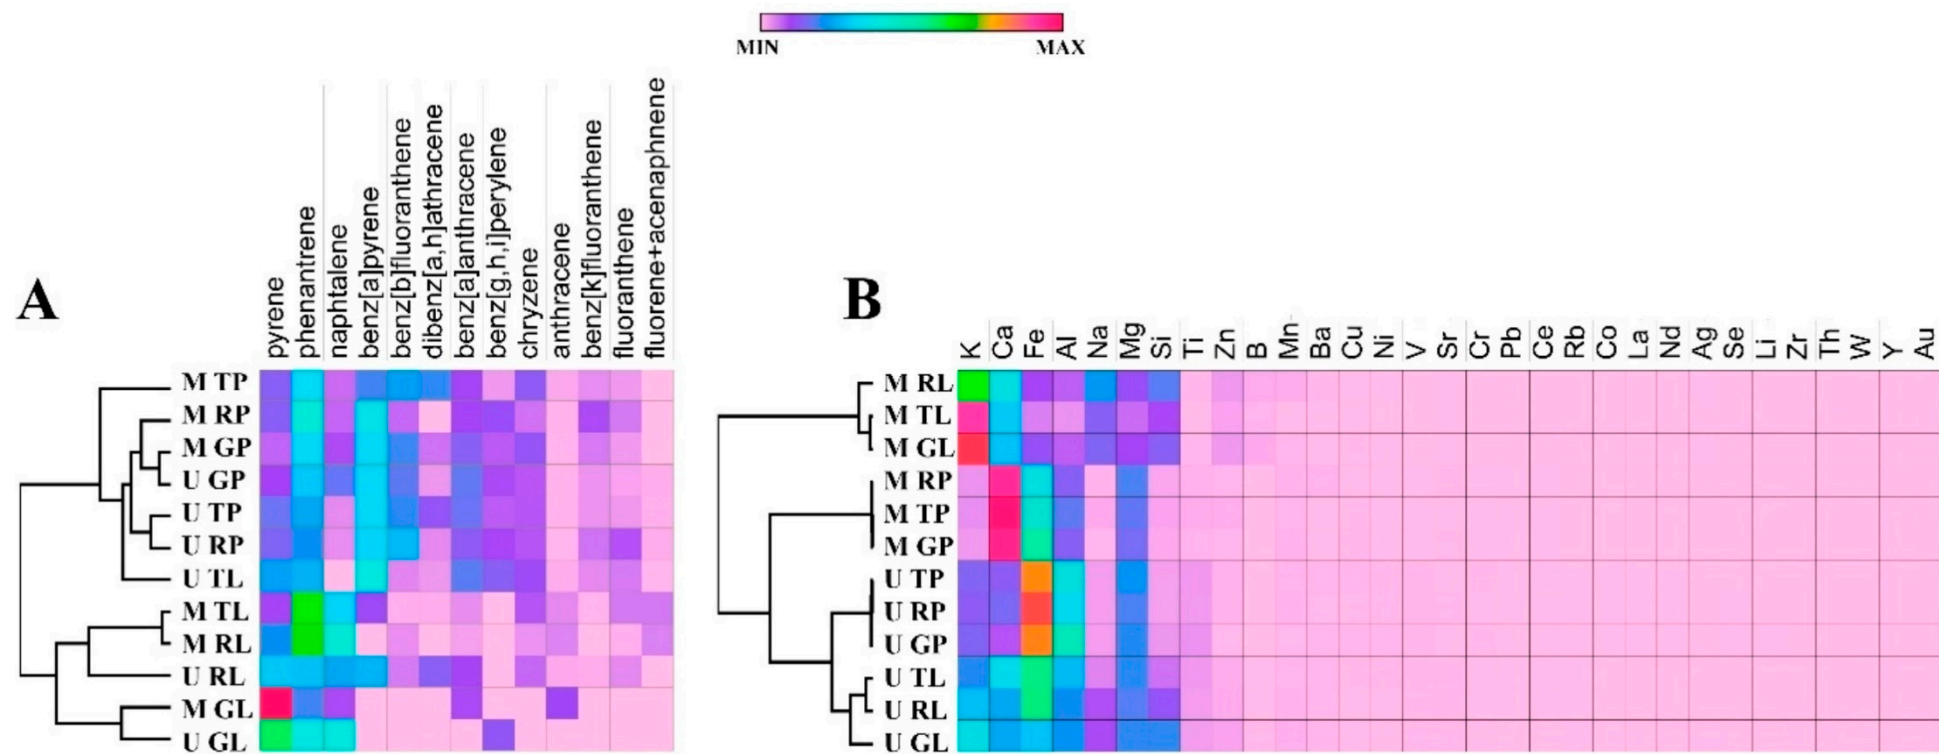

**Figure S9.** Heat maps of the PAHs (A) and metals (B) in biotopes of functional zones of Murmansk and Moscow.

M TP, road dust from Moscow traffic zone; M RP, road dust from Moscow residential zone; M GP, road dust from Moscow recreational zone; U TP, road dust from Murmansk traffic zone; U RP, road dust from Murmansk residential zone; U GP, road dust from Murmansk recreational zone; M TL, leaf dust from Moscow traffic zone; M RL, leaf dust from Moscow residential zone; M GL, leaf dust from Moscow recreational zone; U TL, leaf dust from Murmansk traffic zone; U RL, leaf dust from Murmansk residential zone; U GL, leaf dust from Murmansk recreational zone. Color code from pink (MIN) to red (MAX) depicts relative amount of respective group.
